# Supplementary material for: Associative vs. dissociative binding of CO 2 on M 4 transition metal clusters
Source: Royal Society of Chemistry journal article supplement (doi:10.1039/d5cp03419a), 2025-12-09
Supplement: d5cp03419a1.xlsx [file d5cp03419a1.xlsx]

## Sheet: Nb4
B3P86/sdd
a.u. to eV	27.2116
CO2	-188.923																								-188.695
											Triplet
Nb4		assoc_CO2		chair_CO2		dissoc_CO2		chair_CO2_TS			Nb4
Kick0996	-228.594	Kick0050	-417.846	Kick0041	-417.846	Kick0001	-417.871	Kick0052	-417.735		-228.887	Kick0050
Kick0997	-228.757	Kick0042	-417.846	Kick0087	-417.846	Kick0050	-417.9	Kick0055	-417.782		-228.898	Kick0999
Kick0995	-228.79	Kick0026	-417.924	Kick0042	-417.846	Kick0005	-417.922	Kick0037	-417.839
Kick0059	-228.853	Kick0078	-417.972	Kick0031	-417.868	Kick0035	-417.924	Kick0079	-417.845
Kick0087	-228.856	Kick0070	-417.985	Kick0090	-417.875	Kick0061	-417.934	Kick0042	-417.845
Kick0038	-228.867	Kick0058	-417.985	Kick0012	-417.884	Kick0039	-417.943	Kick0092	-417.846
Kick0046	-228.867	Kick0097	-417.994	Kick0018	-417.89	Kick0000	-417.945	Kick0090	-417.866
Kick0021	-228.867	Kick0066	-417.994	Kick0053	-417.907	Kick0029	-417.946	Kick0002	-417.868
Kick0066	-228.867	Kick0035	-418.002	Kick0039	-417.924	Kick0068	-417.951	Kick0050	-417.869
Kick0076	-228.869	Kick0075	-418.003	Kick0032	-417.934	Kick0054	-417.951	Kick0047	-417.878
Kick0012	-228.869	Kick0069	-418.063	Kick0003	-417.975	Kick0012	-417.967	Kick0027	-417.882
Kick0035	-228.88	Kick0088	-418.065	Kick0098	-417.997	Kick0006	-417.97	Kick0089	-417.885
Kick0050	-228.913	Kick0016	-418.071	Kick0026	-418.002	Kick0008	-417.98	Kick0034	-417.886					B3P86/sdd											TPSSTPSS/Def2TZVP
Kick0026	-228.913	Kick0023	-418.086	Kick0035	-418.004	Kick0089	-417.983	Kick0048	-417.887											E_ads
				Kick0013	-418.004	Kick0080	-417.985	Kick0018	-417.889						0,1	0,3	0,5	0,7		0,1	0,3	0,5	0,7
	-0.880295			Kick0048	-418.013	Kick0088	-417.986	Kick0085	-417.89					Nb4	-228.913	-228.898	-228.87	-228.836							-227.801	-227.774	-227.768	-227.726
				Kick0027	-418.06	Kick0011	-417.994	Kick0031	-417.891					Nb4 + CO2	-417.835	-417.821	-417.792	-417.759		0	0.398835	1.17138	2.07461		-416.495	-416.468	-416.462	-416.421		0	0.731448	0.903071	2.03551
				Kick0071	-418.063	Kick0004	-417.994	Kick0013	-417.892					g1	-417.846	-417.897	-417.874	-417.849		-0.290617	-1.68414	-1.04007	-0.37407		-416.5	-416.485	-416.541	-416.432		-0.134063	0.273349	-1.23915	1.71371
				Kick0020	-418.077	Kick0027	-417.997	Kick0077	-417.892					ts1	-417.839	-417.853	-417.842	-417.81		-0.0941113	-0.469819	-0.187774	0.68371		-416.492	-416.481	-416.495	-416.433		0.0893438	0.389406	0.000497972	1.68185
				Kick0069	-418.086	Kick0021	-418.002	Kick0012	-417.895					g2	-417.924	-417.912	-417.885	-417.86		-2.42492	-2.10008	-1.36122	-0.66214		-416.577	-416.566	-416.541	-416.515		-2.22304	-1.9195	-1.23907	-0.528142
						Kick0046	-418.003	Kick0028	-417.911					ts2	-417.892	-417.891	-417.882	-417.85		-1.55159	-1.50338	-1.26493	-0.399066		-416.546	-416.544	-416.521	-416.499		-1.37053	-1.33238	-0.687357	-0.095178
						Kick0087	-418.004	Kick0032	-417.916					g3	-418.004	-418.011	-417.984	-417.948		-4.60058	-4.79343	-4.05178	-3.06098		-416.652	-416.654	-416.624	-416.587		-4.25518	-4.32359	-3.50359	-2.50384
						Kick0094	-418.004	Kick0003	-417.937					ts3	-417.97	-417.972	-417.955	-417.946		-3.67004	-3.73321	-3.25037	-3.02294		-416.616	-416.655	-416.604	-416.579		-3.27363	-4.35164	-2.95084	-2.26607
						Kick0084	-418.004	Kick0071	-417.94					g4	-418.078	-418.08	-418.055	-418.017		-6.61425	-6.65127	-5.98494	-4.94788		-416.709	-416.708	-416.681	-416.642		-5.82425	-5.77821	-5.05493	-3.99264
						Kick0003	-418.008	Kick0081	-417.965
						Kick0085	-418.013
						Kick0083	-418.066
						Kick0047	-418.068
						Kick0082	-418.071								r(CO)	r(CO)	theta(OCO)	v_bend	v_bend	v_symm_stretch	v_asym_stretch	v_imag	E(HOMO)	E(LUMO)	q(M4)	q(CO2)	E_ads	E_int
						Kick0019	-418.076							M4									-0.16544	-0.08863
						Kick0028	-418.078							g1	1.185	1.194	179.98	546.488	546.888	1255.69	2316.88		-0.1557	-0.08467	-0.097654	0.097666	-0.290617	-0.292307
														ts1	1.208	1.233	152.28	355.667	417.033	1134.42	2027.61	-99.5722	-0.16788	-0.11019	0.162209	-0.162299	-0.0941113	-0.785588
														g2	1.295	1.295	132.66	499.124	704.308	1136.62	1543.13		-0.18492	-0.1171	0.501446	-0.501458	-2.42492	-0.513605
														ts2	1.285	1.339	131.47	382.023	677.451	1036.65	1473.78	-114.86	-0.17398	-0.11286	0.577384	-0.57743	-1.55159	5.13465
														g3	1.322	3.285	89.87	502.311	570.983	688.08	1271.31		-0.17063	-0.1155	1.27362	-1.27368	-4.60058	3.5833
														ts3	1.891	4.344	64.43	440.02	630.777	675.247	720.514	-406.871	-0.18736	-0.12079	1.07932	-1.07938	-3.67004	3.01623
														g4	3.16	4.641	46.31	666.184	696.44	741.497	762.139		-0.18607	-0.12483	1.27362	-1.27368	-6.61425	13.9447
																						q(M4)	q(CO2)		E(M4)	E(CO2)	E_int
															q(M)				q(C)	q(O)	q(O)
														M4	-1.5e-05	-4e-06	-9e-06	1.7e-05	0.327958	-0.163971	-0.163971
														g1	-0.026724	-0.026641	-0.017635	-0.026654	0.351212	-0.124762	-0.128784	-0.097654	0.097666		-228.913	-188.922	-0.292307
														ts1	0.003862	0.003854	0.104202	0.050291	0.215682	-0.201547	-0.176434	0.162209	-0.162299		-228.866	-188.901	-0.785588
														g2	0.009356	0.008705	0.24172	0.241665	0.0555	-0.278468	-0.27849	0.501446	-0.501458		-228.907	-188.846	-0.513605
														ts2	-0.032214	0.216906	0.233153	0.159539	0.016412	-0.290678	-0.303164	0.577384	-0.57743		-228.863	-188.627	5.13465
														g3	0.434101	0.206278	0.172652	0.460588	-0.436752	-0.426609	-0.410315	1.27362	-1.27368		-228.884	-188.593	3.5833
														ts3	0.303376	0.214161	0.178576	0.383208	-0.294379	-0.436621	-0.348379	1.07932	-1.07938		-228.863	-188.627	3.01623
														g4	0.434101	0.206278	0.172652	0.460588	-0.436752	-0.426609	-0.410315	1.27362	-1.27368		-228.875	-188.13	13.9447

## Sheet: Mo4
B3P86/sdd
a.u. to eV	27.2116
CO2	-188.923																								-188.695
Zero	-462.855
Mo4		assoc_CO2		chair_CO2		dissoc_CO2		chair_CO2_TS
Kick0996	-273.628	Kick0082	-462.864	Kick0060	-462.855	Kick0099	-462.71	Kick0086	-462.854
Kick0997	-273.813	Kick0067	-462.877	Kick0073	-462.877	Kick0047	-462.735	Kick0049	-462.859
Kick0995	-273.883	Kick0076	-462.877	Kick0083	-462.878	Kick0098	-462.814	Kick0033	-462.868
Kick0994	-273.897	Kick0021	-462.877	Kick0041	-462.89	Kick0080	-462.863	Kick0073	-462.871
Kick0001	-273.899	Kick0047	-462.877	Kick0086	-462.894	Kick0013	-462.865	Kick0078	-462.875
Kick0027	-273.899	Kick0019	-462.878	Kick0031	-462.894	Kick0053	-462.87	Kick0017	-462.876
Kick0024	-273.899	Kick0072	-462.885	Kick0051	-462.901	Kick0079	-462.874	Kick0099	-462.877
Kick0040	-273.899	Kick0043	-462.887	Kick0053	-462.901	Kick0064	-462.877	Kick0020	-462.877
Kick0082	-273.899	Kick0003	-462.898	Kick0037	-462.905	Kick0077	-462.877	Kick0038	-462.878
Kick0999	-273.899	Kick0062	-462.899	Kick0024	-462.905	Kick0028	-462.878	Kick0080	-462.884
Kick0087	-273.922	Kick0060	-462.901	Kick0038	-462.912	Kick0063	-462.881	Kick0053	-462.89
Kick0051	-273.922	Kick0002	-462.905	Kick0079	-462.916	Kick0083	-462.883	Kick0066	-462.892
Kick0026	-273.922	Kick0016	-462.906	Kick0039	-462.917	Kick0055	-462.883	Kick0007	-462.892
Kick0050	-273.932	Kick0026	-462.916	Kick0072	-462.919	Kick0088	-462.893	Kick0048	-462.893					B3P86/sdd											TPSSTPSS/Def2TZVP
Kick0031	-273.932	Kick0096	-462.916	Kick0028	-462.926	Kick0061	-462.894	Kick0008	-462.894											E_ads
Kick0039	-273.932	Kick0048	-462.917	Kick0026	-462.926	Kick0023	-462.898	Kick0082	-462.896						0,1	0,3	0,5	0,7		0,1	0,3	0,5	0,7
Kick0047	-273.932	Kick0039	-462.919	Kick0088	-462.945	Kick0096	-462.899	Kick0009	-462.902					Mo4	-273.933	-273.917	-273.911	-273.868							-272.75	-272.736	-272.71	-272.7
Kick0076	-273.932	Kick0064	-462.919	Kick0045	-462.946	Kick0062	-462.903	Kick0012	-462.903					Mo4 + CO2	-462.855	-462.839	-462.833	-462.791		0	0.430569	0.59761	1.74346		-461.445	-461.431	-461.405	-461.395		0	0.381697	1.0944	1.37008
Kick0025	-273.932	Kick0050	-462.926	Kick0066	-462.947	Kick0006	-462.906	Kick0094	-462.913					g1	-462.864	-462.862	-462.852	-462.846	g1	-0.236912	-0.180979	0.0891566	0.250427		-461.518	-461.509	-461.485	-461.46		-1.97972	-1.73171	-1.08614	-0.410043
Kick0044	-273.933	Kick0081	-462.932	Kick0087	-462.96	Kick0007	-462.912	Kick0011	-462.923					ts1	-462.863	-462.862	-462.907	-462.845	ts1	-0.221392	-0.180047	-1.40065	0.260446		-461.448	-461.441	-461.429	-461.437		-0.0837764	0.107902	0.430605	0.219633
		Kick0034	-462.939	Kick0034	-462.961	Kick0089	-462.913							g2	-462.919	-462.929	-462.932	-462.914	g2	-1.75252	-2.00534	-2.08871	-1.59927		-461.494	-461.499	-461.494	-461.468		-1.32702	-1.47973	-1.34427	-0.62545
		Kick0005	-462.942	Kick0043	-462.966	Kick0095	-462.919							ts2	-462.896	-462.908	-462.898	-462.873	ts2	-1.115	-1.44113	-1.15971	-0.477854		-461.474	-461.484	-461.467	-461.463		-0.784557	-1.06337	-0.595735	-0.486018
		Kick0063	-462.945	Kick0040	-462.969	Kick0042	-462.926							g3	-462.975	-462.993	-462.979	-462.966	g3	-3.27466	-3.73996	-3.38484	-3.02629		-461.555	-461.562	-461.547	-461.524		-3.00709	-3.17703	-2.77653	-2.15197
		Kick0007	-462.947	Kick0006	-463.003	Kick0005	-462.929							ts4	-462.961	-462.974	-462.972	-462.947	ts4	-2.88693	-3.22765	-3.18972	-2.50312		-461.539	-461.536	-461.538	-461.512		-2.55747	-2.48123	-2.53562	-1.82192
		Kick0094	-462.948			Kick0025	-462.93							g4	-462.969	-462.971	-462.983	-462.955	g4	-3.1018	-3.15142	-3.47989	-2.7285		-461.547	-461.544	-461.544	-461.506		-2.76823	-2.70295	-2.707	-1.6571
		Kick0084	-462.956			Kick0057	-462.93							ts4	-462.961	-462.974	-462.972	-462.947	ts4	-2.88693	-3.22765	-3.18972	-2.50312		-461.539	-461.536	-461.538	-461.512		-2.55747	-2.48123	-2.53562	-1.82192
		Kick0025	-462.969			Kick0026	-462.937							g5	-462.964	-462.965	-462.961	-462.964	g5	-2.95168	-2.98212	-2.89531	-2.96841		-461.539	-461.537	-461.525	-461.528		-2.54939	-2.51165	-2.19314	-2.25006
						Kick0084	-462.939							ts5	-462.92	-462.941	-462.952	-462.92	ts5	-1.77221	-2.34344	-2.64514	-1.76858		-461.493	-461.526	-461.515	-461.474		-1.31624	-2.20253	-1.90086	-0.793156
						Kick0021	-462.942							g6	-463.027	-463.041	-463.022	-462.992	g6	-4.66587	-5.06513	-4.54784	-3.71871		-461.603	-461.609	-461.585	-461.544		-4.30601	-4.46027	-3.8159	-2.68466
						Kick0018	-462.942
						Kick0049	-462.942
						Kick0068	-462.943								r(CO)	r(CO)	theta(OCO)	v_bend	v_bend	v_symm_stretch	v_asym_stretch	v_imag	E(HOMO)	E(LUMO)	q(M4)	q(CO2)	E_ads	E_int
						Kick0008	-462.945							M4									-0.17587	-0.09788
						Kick0035	-462.945							g1	1.187	1.192	179.12	471.094	540.157	1251.12	2333.39		-0.14407	-0.08817	-0.096817	0.096846	-0.236912	-0.515671
						Kick0074	-462.947							ts1	1.182	1.196	178.22	476.104	540.654	1265.63	2325.32	-61.1649	-0.14492	-0.088	-0.102702	0.10287	-0.221392	-0.494708
						Kick0045	-462.947							g2	1.248	1.372	149.73	510.176	726.322	1004.46	1606.13		-0.19111	-0.12679	0.563854	-0.563833	-1.75252	-1.78665
						Kick0056	-462.947							ts2	1.187	1.993	109.14	408.673	442.822	764.928	1877.51	-387.531	-0.18618	-0.13204	0.487864	-0.48795	-1.115	4.74136
						Kick0037	-462.951							g3	1.231	3.363	132.98	459.381	527.968	688.322	1660.03		-0.19025	-0.14359	0.753108	-0.75312	-3.27466	3.65684
						Kick0058	-462.952							ts4	1.222	3.461	146.59	451.731	518.794	687.068	1712.63	-97.7903	-0.17781	-0.13288	0.742487	-0.742614	-2.88693	3.91668
						Kick0039	-462.956							g4	1.251	3.095	129.58	429.268	487.477	690.175	1554.97		-0.18808	-0.12375	0.848139	-0.848198	-3.1018	3.57527
						Kick0069	-462.959							ts4	1.222	3.461	146.59	451.731	518.794	687.068	1712.63	-296.914	-0.17781	-0.13288	0.742487	-0.742614	-2.88693	3.91668
						Kick0036	-462.959							g5	1.352	3.9	65.41	515.192	616.051	945.079	1163.95		-0.19298	-0.1206	0.841811	-0.841599	-2.95168	4.38119
						Kick0086	-462.96							ts5	2.078	4.169	49.05	538.618	733.267	799.402	945.802	-384.973	-0.20655	-0.14798	0.991672	-0.991778	-1.77221	12.6466
						Kick0070	-462.961							g6	3.242	4.326	49.8	651.782	697.725	713.701	810.08		-0.19849	-0.13732	1.12558	-1.12547	-4.66587	15.4507
						Kick0090	-462.962
						Kick0015	-462.962
						Kick0081	-462.964															q(M4)	q(CO2)		E(M4)	E(CO2)	E_int
						Kick0014	-462.966								q(M)				q(C)	q(O)	q(O)
						Kick0087	-462.968							M4	-1.7e-05	-1.5e-05	-4e-06	-1e-05	0.327958	-0.163971	-0.163971
						Kick0017	-462.969							g1	-0.021341	-0.021333	-0.036343	-0.0178	0.348679	-0.132191	-0.119642	-0.096817	0.096846		-273.922	-188.923	-0.515671
						Kick0011	-463.026							ts1	-0.018406	-0.037526	-0.018405	-0.028365	0.348919	-0.124273	-0.121776	-0.102702	0.10287		-273.922	-188.922	-0.494708
						Kick0040	-463.027							g2	0.194199	0.227533	0.087182	0.05494	0.03356	-0.301826	-0.295567	0.563854	-0.563833		-273.901	-188.893	-1.78665
														ts2	0.166548	0.212278	0.066414	0.042624	0.069207	-0.408499	-0.148658	0.487864	-0.48795		-273.897	-188.672	4.74136
														g3	0.211989	0.152748	0.327741	0.06063	-0.098637	-0.236175	-0.418308	0.753108	-0.75312		-273.896	-188.631	3.65684
														ts4	0.236596	0.149369	0.304304	0.052218	-0.093373	-0.228699	-0.420542	0.742487	-0.742614		-273.883	-188.623	3.91668
														g4	0.324446	0.338451	0.129842	0.0554	-0.137925	-0.40629	-0.303983	0.848139	-0.848198		-273.874	-188.619	3.57527
														ts4	0.236596	0.149369	0.304304	0.052218	-0.093373	-0.228699	-0.420542	0.742487	-0.742614		-273.883	-188.623	3.91668
														g5	0.347634	0.26389	0.154937	0.07535	-0.189165	-0.28618	-0.366254	0.841811	-0.841599		-273.861	-188.581	4.38119
														ts5	0.353285	0.297401	0.238281	0.102705	-0.237243	-0.352305	-0.40223	0.991672	-0.991778		-273.838	-188.299	12.6466
														g6	0.350738	0.381625	0.181734	0.211486	-0.355033	-0.406565	-0.363871	1.12558	-1.12547		-273.875	-188.125	15.4507

## Sheet: Ru4
B3P86/sdd
a.u. to eV	27.2116
CO2	-188.923																																	-188.695
Zero	-569.854
Ru4		assoc_CO2		chair_CO2		dissoc_CO2		chair_CO2_TS
Kick0996	-380.838	Kick0091	-569.862	Kick0010	-569.869	Kick0017	-569.863	Kick0029	-569.684
Kick0997	-380.84	Kick0004	-569.872	Kick0053	-569.872	Kick0037	-569.869	Kick0007	-569.735
Kick0017	-380.86	Kick0035	-569.872	Kick0035	-569.91	Kick0021	-569.878	Kick0076	-569.765
Kick0051	-380.86	Kick0089	-569.872	Kick0015	-569.926	Kick0034	-569.88	Kick0003	-569.833
Kick0994	-380.875	Kick0013	-569.883	Kick0066	-569.927	Kick0040	-569.91	Kick0074	-569.843
Kick0026	-380.92	Kick0011	-569.888	Kick0013	-569.927	Kick0048	-569.913	Kick0057	-569.848
Kick0070	-380.924	Kick0039	-569.91	Kick0031	-569.928	Kick0007	-569.916	Kick0010	-569.853
Kick0095	-380.924	Kick0015	-569.914	Kick0021	-569.928	Kick0036	-569.923	Kick0014	-569.858
Kick0071	-380.924	Kick0026	-569.928	Kick0047	-569.948	Kick0039	-569.925	Kick0093	-569.859
Kick0087	-380.924	Kick0032	-569.938	Kick0007	-569.948	Kick0023	-569.926	Kick0061	-569.868						B3P86/sdd																			TPSSTPSS/Def2TZVP
Kick0054	-380.924	Kick0006	-569.938	Kick0026	-569.963	Kick0018	-569.927	Kick0090	-569.871
Kick0002	-380.924	Kick0081	-569.943			Kick0000	-569.928	Kick0069	-569.872																E_ads
Kick0003	-380.924	Kick0025	-569.959			Kick0019	-569.934	Kick0042	-569.872							1	3	5	7	9	11	13	15		1	3	5	7	9	11	13	15
Kick0050	-380.924					Kick0042	-569.942	Kick0023	-569.877						Ru4	-380.932	-380.957	-380.972	-380.977	-381.001	-380.984	-381.001	-380.956											-379.514	-379.522	-379.522	-379.517	-379.524	-379.504	-379.478	-379.452
Kick0033	-380.924					Kick0026	-569.943	Kick0024	-569.877						Ru4+ CO2	-569.854	-569.88	-569.894	-569.9	-569.924	-569.906	-569.923	-569.879		0	-0.696696	-1.08756	-1.23701	-1.89538	-1.4112	-1.87803	-0.66429		-568.209	-568.217	-568.216	-568.211	-568.219	-568.198	-568.173	-568.146		0	-0.225285	-0.208005	-0.069825	-0.267925	0.280688	0.975835
Kick0085	-380.924					Kick0047	-569.947	Kick0047	-569.878						g1	-569.872	-569.908	-569.916	-569.921	-569.936	-569.924	-569.918	-569.889	g1	-0.483327	-1.45633	-1.68017	-1.81551	-2.21559	-1.89422	-1.72831	-0.95851		-568.22	-568.252	-568.269	-568.261	-568.253	-568.24	-568.184	-568.159		-0.309769	-1.17453	-1.64248	-1.41203	-1.20215	-0.847987	0.664134
Kick0047	-380.924					Kick0024	-569.948	Kick0068	-569.881						ts1	-569.871	-569.883	-569.879	-569.893	-569.935	-569.912	-569.908	-569.861	ts1	-0.450975	-0.792543	-0.677708	-1.0422	-2.19436	-1.57967	-1.47235	-0.172204		-568.171	-568.19	-568.19	-568.187	-568.198	-568.206	-568.169	-568.155		1.03821	0.518634	0.522634	0.58952	0.304343	0.077398	1.09013
Kick0010	-380.929					Kick0029	-569.948	Kick0026	-569.892						g2	-569.91	-569.959	-569.958	-569.967	-569.964	-569.988	-569.934	-569.911	g2	-1.50982	-2.85597	-2.82507	-3.06449	-2.9941	-3.62699	-2.18274	-1.55698		-568.251	-568.269	-568.269	-568.268	-568.253	-568.228	-568.204	-568.171		-1.14231	-1.65272	-1.64248	-1.61794	-1.20215	-0.522754	0.120147
Kick0995	-380.931					Kick0038	-569.948	Kick0060	-569.894						ts2	-569.894	-569.945	-569.945	-569.954	-569.961	-569.94	-569.934	-569.894	ts2	-1.07618	-2.48039	-2.48317	-2.71011	-2.90476	-2.33455	-2.1608	-1.07778		-568.237	-568.255	-568.253	-568.256	-568.254	-568.239	-568.192	-568.155		-0.772175	-1.2616	-1.19409	-1.29447	-1.22155	-0.816122	0.466197
Kick0012	-380.931					Kick0022	-569.948	Kick0071	-569.897						g3	-569.91	-569.959	-569.958	-569.967	-569.964	-569.988	-569.934	-569.911	g3	-1.50981	-2.85597	-2.82507	-3.06449	-2.9941	-3.627	-2.18274	-1.55695		-568.251	-568.269	-568.269	-568.268	-568.253	-568.228	-568.204	-568.17		-1.14231	-1.65272	-1.64248	-1.61794	-1.20212	-0.522781	0.120147
Kick0038	-380.932					Kick0011	-569.952								ts3	-569.892	-569.934	-569.937	-569.941	-569.947	-569.934	-569.934	-569.894	ts3	-1.02099	-2.16916	-2.24449	-2.3623	-2.51946	-2.16518	-2.16079	-1.07778		-568.225	-568.243	-568.241	-568.242	-568.237	-568.214	-568.2	-568.149		-0.433718	-0.933295	-0.886165	-0.909921	-0.766978	-0.154499	0.233429
Kick0058	-380.932					Kick0013	-569.958								g4	-569.928	-569.962	-569.955	-569.962	-569.965	-569.966	-569.945	-569.905	g4	-2.00523	-2.93612	-2.72955	-2.92714	-3.02566	-3.03992	-2.4747	-1.3946		-568.252	-568.266	-568.26	-568.261	-568.258	-568.262	-568.204	-568.164		-1.17368	-1.54809	-1.39197	-1.41203	-1.32792	-1.4538	0.131386
						Kick0035	-569.963								ts4	-569.914	-569.94	-569.938	-569.931	-569.948	-569.93	-569.907	-569.908	ts4	-1.62219	-2.34697	-2.28783	-2.09846	-2.5615	-2.06998	-1.444	-1.45897		-568.235	-568.248	-568.245	-568.239	-568.218	-568.231	-568.174	-568.179		-0.707058	-1.06089	-0.979528	-0.810979	-0.256924	-0.60828	0.932767
															g5	-569.948	-569.984	-569.991	-569.985	-569.979	-569.966	-569.955	-569.946	g5	-2.5565	-3.52347	-3.71498	-3.56758	-3.3936	-3.03578	-2.73536	-2.50852		-568.276	-568.29	-568.288	-568.285	-568.287	-568.245	-568.225	-568.208		-1.83661	-2.2237	-2.14546	-2.08481	-2.12851	-0.98614	-0.45516
															ts5	-569.944	-569.982	-569.963	-569.982	-569.967	-569.96	-569.936	-569.926	ts5	-2.45508	-3.46719	-2.95741	-3.4764	-3.07636	-2.86819	-2.23172	-1.96125		-568.275	-568.29	-568.269	-568.273	-568.258	-568.248	-568.199	-568.169		-1.81362	-2.22261	-1.65005	-1.74015	-1.33369	-1.05537	0.269621
															g6	-569.963	-569.994	-569.991	-569.986	-569.992	-569.966	-569.966	-569.949	g6	-2.94928	-3.8074	-3.71498	-3.57593	-3.74679	-3.03577	-3.05484	-2.58772		-568.286	-568.301	-568.295	-568.298	-568.287	-568.245	-568.212	-568.208		-2.09014	-2.52085	-2.35505	-2.43434	-2.12851	-0.98614	-0.0840485
															ts6	-569.946	-569.971	-569.979	-569.981	-569.977	-569.956	-569.934	-569.916	ts6	-2.49714	-3.18911	-3.40738	-3.4422	-3.34962	-2.7719	-2.177	-1.67982		-568.275	-568.29	-568.286	-568.279	-568.262	-568.236	-568.2	-568.176		-1.81362	-2.22261	-2.09058	-1.9198	-1.46169	-0.732474	0.236477
															g7	-569.908	-569.989	-569.984	-569.986	-569.99	-569.993	-569.982	-569.931	g7	-1.4517	-3.66368	-3.52731	-3.59148	-3.70274	-3.78951	-3.48289	-2.08432		-568.29	-568.294	-568.293	-568.283	-568.282	-568.275	-568.228	-568.189		-2.20008	-2.32751	-2.28305	-2.02766	-1.99158	-1.79947	-0.528958
															ts7	-569.878	-569.896	-569.921	-569.878	-569.884	-569.961	-569.848	-569.903	ts7	-0.647538	-1.14818	-1.80496	-0.652069	-0.811434	-2.90067	0.166581	-1.31465		-568.204	-568.269	-568.276	-568.221	-568.263	-568.237	-568.192	-568.161		0.117453	-1.6491	-1.81729	-0.344926	-1.46642	-0.763849	0.461517
															g8	-569.906	-569.917	-569.936	-569.915	-569.935	-569.953	-569.893	-569.916	g8	-1.41016	-1.70101	-2.22461	-1.6462	-2.19156	-2.68283	-1.04681	-1.69116		-568.228	-568.233	-568.223	-568.217	-568.208	-568.233	-568.163	-568.172		-0.526046	-0.650186	-0.393771	-0.226583	0.0126071	-0.667547	1.23101
																	r(CO)	r(CO)	theta(OCO)	v_bend	v_bend	v_symm_stretch	v_asym_stretch	v_imag	E(HOMO)	E(LUMO)	q(M4)	q(CO2)	E_ads	E_int
																M4									-0.18958	-0.13846
																g1	1.185	1.192	179.78	527.298	579.341	1267.86	2323.65		-0.18025	-0.12753	-0.124729	0.124712	-0.483327	-0.513643
																ts1	1.181	1.202	176.67	497.153	568.625	1251.24	2302.53	81.81	-0.18289	-0.1287	-0.115462	-0.354308	-0.450975	-0.46971
																g2	1.219	1.326	140.01	536.263	694.91	1023.31	1815.94		-0.22178	-0.16662	0.362791	-0.488689	-1.50982	-0.105537
																ts2	1.253	1.288	141.43	542.793	732.386	1116.8	1668.53	-164.736	-0.21263	-0.15754	0.383222	-0.508062	-1.07618	0.0294511
																g3	1.219	1.326	140.06	536.312	694.844	1023.37	1815.75		-0.22181	-0.16605	0.36288	-0.488773	-1.50981	-0.11206
																ts3	1.225	1.345	135.82	535.431	701.319	975.528	1754.2	-130.12	-0.21561	-0.15967	0.415745	-0.524702	-1.02099	0.752847
																g4	1.234	1.396	124.38	564.991	728.972	875.891	1666.86		-0.2144	-0.15977	0.422724	-0.513131	-2.00523	0.871337
																ts4	1.199	1.884	110.72	480.838	519.934	793.156	1835.14	-407.849	-0.21372	-0.15625	0.396567	-0.484208	-1.62219	4.6116
																g5	1.183	3.535	100.98	468.839	567.336	908.318	1951.52		-0.221	-0.16829	0.364891	-0.441345	-2.5565	5.18734
																ts5	1.185	3.893	121.27	443.603	577.327	917.672	1943.53	-99.9452	-0.23101	-0.17482	0.361382	-0.435785	-2.45508	4.98879
																g6	1.189	4.609	136.51	450.393	579.686	923.512	1918.66		-0.22541	-0.16658	0.417845	-0.257622	-2.94928	4.87201
																ts6	1.183	4.073	112.22	432.658	560.115	913.054	1948.4	-103.498	-0.22766	-0.17626	0.362653	-0.229561	-2.49714	5.28638
																g7	1.304	3.626	141.75	424.887	742.291	920.434	1254.8		-0.22431	-0.16807	0.538505	-0.510473	-1.4517	6.4162
																ts7	1.426	3.745	118.55	523.245	667.082	816.178	901.996	-631.931	-0.2106	-0.16798	0.590807	-0.49338	-0.647538	8.60821
																g8	3.177	3.206	94.24	516.938	709.203	921.274	940.463		-0.22984	-0.17203	0.719898	-0.563045	-1.41016	18.896
																								q(M4)	q(CO2)		E(M4)	E(CO2)	E_int
																	q(M)				q(C)	q(O)	q(O)
																M4	-3.7e-05	1.8e-05	1.6e-05	-3.7e-05	0.327958	-0.163971	-0.163971
																g1	-0.034059	-0.049988	-0.019988	-0.020694	0.359437	-0.124496	-0.110229	-0.124729	0.124712		-380.93	-188.922	-0.513643
																ts1	-0.010026	-0.029656	-0.036695	-0.039085	0.422916	-0.153279	-0.201029	-0.115462	-0.354308		-380.93	-188.922	-0.46971
																g2	0.078158	0.074403	0.086947	0.123283	0.125755	-0.246296	-0.242393	0.362791	-0.488689		-380.925	-188.865	-0.105537
																ts2	0.072041	0.050003	0.130371	0.130807	0.124871	-0.260582	-0.24748	0.383222	-0.508062		-380.922	-188.872	0.0294511
																g3	0.074532	0.078215	0.123214	0.086919	0.12575	-0.242429	-0.246344	0.36288	-0.488773		-380.925	-188.865	-0.11206
																ts3	0.111758	0.068398	0.144564	0.091025	0.108899	-0.264506	-0.260196	0.415745	-0.524702		-380.926	-188.852	0.752847
																g4	0.162011	0.074497	0.116217	0.069999	0.090577	-0.247991	-0.26514	0.422724	-0.513131		-380.927	-188.812	0.871337
																ts4	0.176716	0.084043	0.104939	0.030869	0.087575	-0.298729	-0.185479	0.396567	-0.484208		-380.923	-188.685	4.6116
																g5	0.04378	0.093524	0.097918	0.129669	0.076474	-0.133231	-0.308114	0.364891	-0.441345		-380.921	-188.627	5.18734
																ts5	0.04205	0.119652	0.100132	0.099548	0.074335	-0.137378	-0.298407	0.361382	-0.435785		-380.909	-188.627	4.98879
																g6	0.122565	0.146437	0.047365	0.101478	-0.160209	0.043496	-0.301118	0.417845	-0.257622		-380.922	-188.626	4.87201
																ts6	0.097795	0.114419	0.061331	0.089108	-0.133157	0.073995	-0.303556	0.362653	-0.229561		-380.921	-188.626	5.28638
																g7	0.181281	0.136047	0.055512	0.165665	-0.027992	-0.192744	-0.317729	0.538505	-0.510473		-380.898	-188.6	6.4162
																ts7	0.165721	0.116215	0.17775	0.131121	-0.097285	-0.164074	-0.329306	0.590807	-0.49338		-380.901	-188.552	8.60821
																g8	0.17751	0.162916	0.189317	0.190155	-0.156675	-0.27377	-0.289275	0.719898	-0.563045		-380.899	-188.144	18.896
[truncated: 1 more columns]

## Sheet: Rh4
B3P86/sdd
a.u. to eV	27.2116
CO2	-188.923																												-188.695
Zero	-632.714
Rh4		assoc_CO2		chair_CO2		dissoc_CO2		chair_CO2_TS
Kick0996	-443.666	Kick0056	-632.692	Kick0057	-632.699	Kick0081	-632.667	Kick0047	-632.556
Kick0993	-443.73	Kick0084	-632.692	Kick0094	-632.722	Kick0076	-632.674	Kick0091	-632.559
Kick0087	-443.731	Kick0030	-632.707	Kick0004	-632.726	Kick0029	-632.676	Kick0030	-632.572
Kick0079	-443.731	Kick0074	-632.717	Kick0058	-632.727	Kick0093	-632.692	Kick0074	-632.58
Kick0059	-443.731	Kick0026	-632.727	Kick0045	-632.73	Kick0077	-632.695	Kick0093	-632.58
Kick0063	-443.731	Kick0035	-632.749	Kick0046	-632.743	Kick0021	-632.697	Kick0075	-632.58
Kick0043	-443.731	Kick0034	-632.751	Kick0050	-632.749	Kick0079	-632.697	Kick0029	-632.641
Kick0088	-443.736	Kick0038	-632.753	Kick0005	-632.749	Kick0014	-632.707	Kick0058	-632.65
Kick0051	-443.736	Kick0037	-632.76	Kick0025	-632.76	Kick0086	-632.722	Kick0066	-632.653
Kick0050	-443.792	Kick0025	-632.763	Kick0083	-632.763	Kick0082	-632.727	Kick0063	-632.687						B3P86/sdd														TPSSTPSS/Def2TZVP
Kick0026	-443.792	Kick0071	-632.766	Kick0095	-632.763	Kick0047	-632.727	Kick0073	-632.691
Kick0042	-443.792	Kick0061	-632.771			Kick0037	-632.729	Kick0023	-632.695														E_ads
Kick0999	-443.792					Kick0055	-632.732	Kick0067	-632.696							0,1	0,3	0,5	0,7	0,9			0,1	0,3	0,5	0,7	0,9
						Kick0035	-632.743	Kick0061	-632.702						Rh4	-443.792	-443.769	-443.765	-443.774	-443.771									-442.174	-442.158	-442.16	-442.157	-442.132
						Kick0092	-632.746	Kick0076	-632.727						Rh4 + CO2	-632.714	-632.691	-632.687	-632.697	-632.694			0	0.632482	0.73572	0.485825	0.562951		-630.869	-630.853	-630.854	-630.851	-630.826		0	0.438461	0.396228	0.469291	1.15453
						Kick0083	-632.749	Kick0018	-632.727						g1	-632.727	-632.721	-632.725	-632.736	-632.708		g1	-0.349313	-0.17715	-0.283333	-0.575368	0.1781		-630.903	-630.908	-630.904	-630.908	-630.868		-0.944561	-1.08075	-0.968507	-1.05757	0.0106479
						Kick0050	-632.749	Kick0090	-632.727						ts1	-632.727	-632.727	-632.727	-632.741	-632.704		ts1	-0.351413	-0.33289	-0.340545	-0.714805	0.287254		-630.883	-630.878	-630.885	-630.882	-630.85		-0.397036	-0.23861	-0.447514	-0.369988	0.496511
						Kick0032	-632.75	Kick0004	-632.728						g2	-632.749	-632.761	-632.762	-632.771	-632.73		g2	-0.935508	-1.27533	-1.30172	-1.54564	-0.411619		-630.903	-630.908	-630.904	-630.906	-630.867		-0.944561	-1.08073	-0.968507	-1.01107	0.0538871
						Kick0072	-632.752	Kick0037	-632.729						ts2	-632.742	-632.727	-632.736	-632.755	-632.728		ts2	-0.756681	-0.337696	-0.576731	-1.09722	-0.359969		-630.892	-630.907	-630.905	-630.904	-630.86		-0.624689	-1.03439	-0.97629	-0.956371	0.233429
						Kick0025	-632.756	Kick0081	-632.742						g3	-632.749	-632.761	-632.762	-632.771	-632.73		g3	-0.935508	-1.27533	-1.30172	-1.54564	-0.411616		-630.903	-630.908	-630.904	-630.906	-630.867		-0.944561	-1.08073	-0.968507	-1.01107	0.0538871
						Kick0043	-632.759	Kick0053	-632.742						ts3	-632.696	-632.711	-632.717	-632.712	-632.705		ts4	0.515965	0.088386	-0.0629132	0.0604397	0.26026		-630.849	-630.853	-630.858	-630.851	-630.832		0.542961	0.415747	0.295771	0.470497	0.996089
						Kick0069	-632.76	Kick0068	-632.743						g4	-632.722	-632.748	-632.748	-632.747	-632.743		g4	-0.204664	-0.924381	-0.919355	-0.890053	-0.76248		-630.886	-630.903	-630.895	-630.888	-630.868		-0.478644	-0.934003	-0.716909	-0.518754	0.0231924
						Kick0099	-632.76	Kick0005	-632.744						ts4	-632.717	-632.744	-632.737	-632.738	-632.732		ts4	-0.0719638	-0.811864	-0.622672	-0.627442	-0.481585		-630.879	-630.883	-630.883	-630.87	-630.868		-0.269278	-0.386533	-0.378315	-0.0436665	0.00887915
						Kick0005	-632.763	Kick0007	-632.758						g5	-632.756	-632.762	-632.765	-632.773	-632.752		g5	-1.12286	-1.28222	-1.36742	-1.60129	-1.032		-630.907	-630.902	-630.908	-630.908	-630.882		-1.04445	-0.891525	-1.06658	-1.07964	-0.352137
						Kick0039	-632.763								ts5	-632.662	-632.67	-632.665	-632.671	-632.654		ts5	1.41744	1.20633	1.33414	1.19349	1.64046		-630.813	-630.814	-630.809	-630.802	-630.787		1.5087	1.4853	1.63638	1.82838	2.22581
						Kick0071	-632.765								g6	-632.685	-632.688	-632.689	-632.69	-632.683		g6	0.794089	0.720729	0.690214	0.666532	0.85824		-630.84	-630.841	-630.831	-630.823	-630.813		0.785335	0.745579	1.02836	1.24004	1.52397
						Kick0048	-632.766
						Kick0056	-632.766
						Kick0013	-632.78
						Kick0091	-632.78									r(CO)	r(CO)	theta(OCO)	v_bend	v_bend	v_symm_stretch	v_asym_stretch	v_imag	E(HOMO)	E(LUMO)	q(M4)	q(CO2)	E_ads	E_int
															M4									-0.20726	-0.11349
															g1	1.186	1.192	179.81	572.019	587.211	1275.26	2322.03		-0.19903	-0.11026	-0.096978	0.097	-0.349313	-0.351492
															ts1	1.224	1.248	151.44	544.617	602.365	1140.95	1916.46	-45.4423	-0.23694	-0.1515	0.219922	-0.219928	-0.351413	0.332629
															g2	1.256	1.269	140.26	539.135	689.385	1127.96	1705.33		-0.23268	-0.15673	0.282752	-0.282775	-0.935508	0.403981
															ts2	1.247	1.318	132.79	551.279	754.635	1084.4	1643.83	-255.523	-0.2245	-0.16421	0.298665	-0.298619	-0.756681	1.08448
															g3	1.256	1.269	140.24	539.083	689.433	1127.89	1705.32		-0.23268	-0.15676	0.282715	-0.282738	-0.935508	0.405641
															ts4	1.19	1.928	110.13	451.504	494.174	746.953	1879.33	-464.217	-0.23648	-0.17341	0.323994	-0.324045	0.515965	7.04748
															g4	1.178	3.371	112.32	445.447	490.647	859.837	1970.65		-0.23755	-0.17975	0.29311	-0.293129	-0.204664	7.71543
															ts4	1.179	3.205	130	434.069	488.698	790.22	1966.75	-152.14	-0.23396	-0.17235	0.294792	-0.294824	-0.0719638	7.78702
															g5	1.224	3.101	130.76	454.769	659.525	692.534	1694.45		-0.22485	-0.15327	0.418591	-0.418659	-1.12286	6.12421
															ts5	1.986	3.27	89.86	579.687	620.183	684.809	714.133	-371.879	-0.22599	-0.16662	0.582307	-0.582336	1.41744	15.9849
															g6	2.822	2.954	80.42	599.233	661.35	707.85	753.524		-0.23424	-0.16914	0.610175	-0.610018	0.794089	19.7733
																							q(M4)	q(CO2)		E(M4)	E(CO2)	E_int
																q(M)				q(C)	q(O)	q(O)
															M4	-1.2e-05	-1.2e-05	-1.2e-05	-1.2e-05	0.327958	-0.163971	-0.163971
															g1	-0.020738	-0.029845	-0.025684	-0.020711	0.348107	-0.137517	-0.11359	-0.096978	0.097		-443.792	-188.923	-0.351492
															ts1	0.048359	0.071377	0.071363	0.028823	-0.197301	0.19526	-0.217887	0.219922	-0.219928		-443.792	-188.897	0.332629
															g2	0.10657	0.107473	0.077149	-0.00844	-0.229145	0.172351	-0.225981	0.282752	-0.282775		-443.791	-188.873	0.403981
															ts2	0.094047	0.06894	0.132052	0.003626	-0.248324	0.150727	-0.201022	0.298665	-0.298619		-443.786	-188.849	1.08448
															g3	0.077158	0.106573	0.107464	-0.00848	-0.229159	0.172348	-0.225927	0.282715	-0.282738		-443.791	-188.873	0.405641
															ts4	0.083059	0.11252	0.152374	-0.023959	-0.166521	0.12361	-0.281134	0.323994	-0.324045		-443.789	-188.68	7.04748
															g4	0.055962	0.089516	0.166295	-0.018663	-0.126696	0.109451	-0.275884	0.29311	-0.293129		-443.788	-188.628	7.71543
															ts4	0.041618	0.092824	0.168386	-0.008036	-0.130146	0.110742	-0.27542	0.294792	-0.294824		-443.788	-188.63	7.78702
															g5	0.176377	0.137365	0.103564	0.001285	-0.260817	0.054407	-0.212249	0.418591	-0.418659		-443.761	-188.625	6.12421
															ts5	0.136282	0.112151	0.21345	0.120424	-0.255323	-0.06459	-0.262423	0.582307	-0.582336		-443.737	-188.332	15.9849
															g6	0.117241	0.100108	0.266381	0.126445	-0.270624	-0.083268	-0.256126	0.610175	-0.610018		-443.746	-188.18	19.7733

## Sheet: Pd4
B3P86/sdd
a.u. to eV	27.2116
CO2	-188.923																												-188.695
Zero	-702.255
Pd4		assoc_CO2		chair_CO2		dissoc_CO2		chair_CO2_TS
Kick0099	-513.315	Kick0086	-702.252	Kick0075	-702.163	Kick0006	-702.154	Kick0068	-702.106
Kick0041	-513.316	Kick0060	-702.266	Kick0037	-702.245	Kick0028	-702.161	Kick0036	-702.107
Kick0026	-513.316	Kick0026	-702.267	Kick0033	-702.256	Kick0070	-702.163	Kick0037	-702.149
Kick0994	-513.319	Kick0062	-702.268	Kick0028	-702.267	Kick0030	-702.201	Kick0081	-702.173
Kick0047	-513.332	Kick0014	-702.271	Kick0055	-702.278	Kick0039	-702.205	Kick0083	-702.216
Kick0072	-513.333	Kick0088	-702.272	Kick0064	-702.281	Kick0087	-702.205	Kick0057	-702.226
Kick0044	-513.333	Kick0000	-702.278	Kick0057	-702.281	Kick0021	-702.212	Kick0025	-702.245
Kick0004	-513.333	Kick0008	-702.281	Kick0001	-702.29	Kick0035	-702.214	Kick0098	-702.264
Kick0058	-513.333	Kick0006	-702.281	Kick0050	-702.29	Kick0023	-702.222	Kick0063	-702.265
Kick0086	-513.333	Kick0025	-702.281			Kick0088	-702.225	Kick0004	-702.266
Kick0078	-513.333	Kick0064	-702.284			Kick0072	-702.225	Kick0009	-702.267
		Kick0035	-702.29			Kick0052	-702.225	Kick0092	-702.27
		Kick0039	-702.29			Kick0051	-702.244	Kick0077	-702.272
						Kick0001	-702.244
						Kick0073	-702.244								B3P86/sdd														TPSSTPSS/Def2TZVP
						Kick0020	-702.245
						Kick0026	-702.245																E_ads
						Kick0083	-702.245									0,1	0,3	0,5	0,7	0,9			0,1	0,3	0,5	0,7	0,9
						Kick0098	-702.246								Pd4	-513.333	-513.359	-513.308	-513.218	-513.12									-511.464	-511.548	-511.508	-511.429
						Kick0013	-702.25								Pd4 + CO2	-702.255	-702.282	-702.23	-702.141	-702.042			0	-0.728076	0.678437	3.11872	5.79206		-700.159	-700.243	-700.203	-700.124		0	-2.2836	-1.19813	0.957848
						Kick0090	-702.25								g1	-702.267	-702.294	-702.242	-702.152	-702.045		g1	-0.333247	-1.04675	0.357487	2.80316	5.70536		-700.169	-700.262	-700.213	-700.132		-0.285523	-2.81321	-1.48964	0.716136
						Kick0043	-702.25								ts1	-702.266	-702.293	-702.241	-702.152	-702.045		ts1	-0.298216	-1.02326	0.373345	2.8053	5.71209		-700.171	-700.249	-700.213	-700.133		-0.33015	-2.46109	-1.47576	0.699809
						Kick0058	-702.259								g2	-702.267	-702.294	-702.242	-702.153	-702.047		g2	-0.333249	-1.04675	0.357494	2.76917	5.6656		-700.188	-700.262	-700.213	-700.132		-0.79955	-2.81321	-1.48964	0.716136
						Kick0067	-702.259								ts2	-702.265	-702.29	-702.238	-702.156	-702.043		ts2	-0.256408	-0.943537	0.46474	2.68965	5.7625		-700.162	-700.255	-700.209	-700.13		-0.0776265	-2.61021	-1.35657	0.771375
						Kick0085	-702.267								g3	-702.29	-702.298	-702.262	-702.181	-702.077		g3	-0.947545	-1.16554	-0.198291	2.01721	4.85484		-700.251	-700.262	-700.217	-700.15		-2.52232	-2.81321	-1.59467	0.251362
						Kick0059	-702.268								ts3	-702.272	-702.298	-702.237	-702.147	-702.042		ts4	-0.458687	-1.15942	0.482836	2.93669	5.7994		-700.242	-700.261	-700.211	-700.132		-2.26272	-2.78681	-1.42542	0.739538
						Kick0092	-702.268								g4	-702.281	-702.306	-702.262	-702.183	-702.073		g4	-0.704782	-1.38335	-0.198286	1.97342	4.94874		-700.24	-700.248	-700.218	-700.144		-2.21727	-2.4249	-1.61372	0.410005
						Kick0012	-702.271								ts4	-702.245	-702.245	-702.221	-702.186	-702.085		ts4	0.275845	0.268568	0.919515	1.88359	4.63002		-700.203	-700.192	-700.174	-700.117		-1.19602	-0.917377	-0.415322	1.14962
						Kick0042	-702.272								g5	-702.285	-702.286	-702.255	-702.185	-702.106		g5	-0.802437	-0.840496	0.000974311	1.90091	4.05693		-700.238	-700.244	-700.197	-700.154		-2.14625	-2.31224	-1.04119	0.116664
						Kick0091	-702.275								ts5	-702.257	-702.255	-702.242	-702.171			ts5	-0.0507876	0.0115096	0.357388	2.29116			-700.213	-700.214	-700.192	-700.142		-1.47113	-1.5095	-0.905948	0.467694
						Kick0000	-702.278								g6	-702.259	-702.258	-702.255	-702.191			g6	-0.113976	-0.085253	-0.000458896	1.73574			-700.215	-700.215	-700.206	-700.151		-1.52664	-1.54379	-1.2831	0.212177
						Kick0056	-702.279								ts6	-702.13	-702.124	-702.109	-702.076			ts6	3.41546	3.56242	3.98622	4.87163			-700.09	-700.089	-700.067	-700.026		1.88079	1.90882	2.48679	3.60982
						Kick0068	-702.281								g7	-702.134	-702.124	-702.115	-702.079			g7	3.30221	3.56029	3.82666	4.78052			-700.094	-700.089	-700.075	-700.035		1.75399	1.90175	2.27155	3.36627
						Kick0099	-702.281
						Kick0019	-702.281
						Kick0097	-702.281									r(CO)	r(CO)	theta(OCO)	v_bend	v_bend	v_symm_stretch	v_asym_stretch	v_imag	E(HOMO)	E(LUMO)	q(M4)	q(CO2)	E_ads	E_int
						Kick0014	-702.284								M4									-0.21001	-0.16422
						Kick0018	-702.285								g1	1.185	1.193	179.96	581.134	584.555	1277.09	2322.28		-0.20193	-0.15599	-0.079926	0.080028	-0.333247	-0.341195
						Kick0047	-702.29								ts1	1.187	1.188	179.96	575.52	581.205	1285.89	2334.77	-23.1882	-0.19968	-0.15599	-0.082098	0.082076	-0.298216	-0.306165
						Kick0086	-702.29								g2	1.185	1.193	178.88	581.098	584.436	1277.06	2322.23		-0.20195	-0.15782	-0.079858	0.079966	-0.333249	-0.338748
															ts2	1.191	1.208	167.37	433.653	559.198	1214.1	2210.88	-121.205	-0.21335	-0.16387	0.006272	-0.006437	-0.256408	-0.156299
															g3	1.238	1.295	135.98	564.788	729.981	1113.77	1703.98		-0.24539	-0.18141	0.307012	-0.307017	-0.947545	0.507321
															ts3	1.219	1.261	148.45	563.064	622.652	1134.73	1890.03	-23.7813	-0.24219	-0.19739	0.288658	-0.288603	-0.458687	0.34125
															g4	1.247	1.363	128.61	422.312	717.086	931.319	1579.73		-0.23855	-0.17888	0.364585	-0.36459	-0.704782	1.63843
															ts4	1.207	2.07	116.34	458.405	582.232	640.766	1771.07	-260.974	-0.23016	-0.15754	0.373666	-0.37367	0.275845	6.74899
															g5	1.201	3.873	161.75	475.883	545.982	634.394	1821.99		-0.23834	-0.16905	0.479295	-0.479266	-0.802437	6.94541
															ts5	1.201	4.205	93.55	545.759	548.47	640.415	1788.19	-89.3603	-0.22942	-0.16886	0.423064	-0.423042	-0.0507876	7.74272
															g6	1.224	4.325	72.43	572.451	578.281	619.081	1630.36		-0.23806	-0.17133	0.45483	-0.45468	-0.113976	7.73034
															ts6	2.285	3.058	89.04	574.244	580.984	632.591	723.725	-233.896	-0.24618	-0.17053	0.650385	-0.65039	3.41546	20.8629
															g7	2.87	2.878	80.3	578.251	585.732	653.183	739.332		-0.24546	-0.17087	0.695424	-0.695499	3.30221	22.8042
																							q(M4)	q(CO2)		E(M4)	E(CO2)	E_int
																q(M)				q(C)	q(O)	q(O)
															M4	-6e-06	9e-06	3.8e-05	-5e-05	0.327958	-0.163971	-0.163971
															g1	-0.004602	-0.026128	-0.038866	-0.01033	0.340678	-0.135109	-0.125541	-0.079926	0.080028		-513.332	-188.923	-0.341195
															ts1	-0.008248	-0.025459	-0.03284	-0.015551	0.344647	-0.140772	-0.121799	-0.082098	0.082076		-513.332	-188.923	-0.306165
															g2	-0.038913	-0.010274	-0.026126	-0.004545	0.340628	-0.12558	-0.135082	-0.079858	0.079966		-513.332	-188.922	-0.338748
															ts2	-0.019398	-7.9e-05	-0.004164	0.029913	0.29617	-0.149639	-0.152968	0.006272	-0.006437		-513.332	-188.918	-0.156299
															g3	0.117649	0.125658	0.061731	0.001974	0.158551	-0.245071	-0.220497	0.307012	-0.307017		-513.325	-188.862	0.507321
															ts3	0.079656	0.079605	0.060585	0.068812	0.183016	-0.241871	-0.229748	0.288658	-0.288603		-513.331	-188.892	0.34125
															g4	-0.031561	0.157907	0.119153	0.119086	0.114792	-0.273043	-0.206339	0.364585	-0.36459		-513.325	-188.829	1.63843
															ts4	-0.056239	0.121838	0.174128	0.133939	0.094685	-0.189319	-0.279036	0.373666	-0.37367		-513.316	-188.669	6.74899
															g5	0.048382	0.201157	0.167275	0.062481	0.047813	-0.180274	-0.346805	0.479295	-0.479266		-513.32	-188.625	6.94541
															ts5	0.026184	0.171501	0.223224	0.002155	0.035602	-0.171847	-0.286797	0.423064	-0.423042		-513.321	-188.625	7.74272
															g6	0.053289	0.183274	0.204587	0.01368	0.011538	-0.168743	-0.297475	0.45483	-0.45468		-513.319	-188.621	7.73034
															ts6	0.156955	0.126716	0.225403	0.141311	-0.017168	-0.300813	-0.332409	0.650385	-0.65039		-513.307	-188.256	20.8629
															g7	0.147675	0.148282	0.253449	0.146018	-0.031483	-0.332292	-0.331724	0.695424	-0.695499		-513.308	-188.181	22.8042

## Sheet: Pt4
B3P86/sdd
a.u. to eV	27.2116
CO2	-188.923																												-188.695
Zero	-668.09
Pd4		assoc_CO2		chair_CO2		dissoc_CO2		chair_CO2_TS
Kick0996	-479.079	Kick0045	-668.095	Kick0053	-668.021	Kick0097	-667.972	Kick0041	-667.972
Kick0086	-479.088	Kick0061	-668.096	Kick0017	-668.094	Kick0087	-668.017	Kick0053	-668.015
Kick0035	-479.088	Kick0051	-668.103	Kick0003	-668.098	Kick0086	-668.021	Kick0056	-668.09
Kick0039	-479.136	Kick0078	-668.106	Kick0051	-668.104	Kick0003	-668.031	Kick0074	-668.102
Kick0050	-479.155	Kick0035	-668.106	Kick0061	-668.106	Kick0090	-668.033	Kick0023	-668.105
Kick0994	-479.166	Kick0029	-668.109	Kick0090	-668.106	Kick0078	-668.034	Kick0073	-668.105
Kick0031	-479.168	Kick0027	-668.114	Kick0046	-668.109	Kick0023	-668.035	Kick0067	-668.106
Kick0047	-479.168	Kick0082	-668.115	Kick0029	-668.115	Kick0044	-668.053	Kick0026	-668.113
Kick0058	-479.168	Kick0022	-668.12	Kick0026	-668.12	Kick0066	-668.066	Kick0002	-668.114
Kick0000	-479.168	Kick0050	-668.12	Kick0021	-668.135	Kick0012	-668.076	Kick0042	-668.116
Kick0021	-479.168	Kick0044	-668.132	Kick0084	-668.135	Kick0053	-668.097
Kick0026	-479.168	Kick0011	-668.134	Kick0074	-668.135	Kick0002	-668.097
		Kick0049	-668.135			Kick0013	-668.101								B3P86/sdd														TPSSTPSS/Def2TZVP
		Kick0003	-668.135			Kick0034	-668.102																E_ads
						Kick0029	-668.105									0,1	0,3	0,5	0,7	0,9			0,1	0,3	0,5	0,7	0,9
						Kick0062	-668.106								Pt4	-479.168	-479.158	-479.158	-479.112	-479.086									-477.335	-477.328	-477.321	-477.332
						Kick0082	-668.106								Pt4 + CO2	-668.09	-668.08	-668.08	-668.034	-668.008			0	0.2654	0.272089	1.52271	2.22434		-666.03	-666.022	-666.015	-666.026		0	0.200441	0.386976	0.0866417	18123.7
						Kick0005	-668.107								g1	-668.106	-668.124	-668.091	-668.07	-668.011		g1	-0.430035	-0.917986	-0.0318745	0.541889	2.15085		-666.063	-666.084	-666.061	-666.034		-0.898954	-1.48033	-0.841347	-0.112104	18123.7
						Kick0015	-668.108								ts1	-668.114	-668.135	-668.109	-668.053	-667.987		ts1	-0.646757	-1.21383	-0.522895	1.02282	2.79723		-666.057	-666.074	-666.05	-666.014		-0.747739	-1.21352	-0.552768	0.421353	18123.7
						Kick0079	-668.109								g2	-668.135	-668.138	-668.123	-668.073	-668.014		g2	-1.20682	-1.31351	-0.898368	0.45438	2.07634		-666.074	-666.081	-666.067	-666.023		-1.19872	-1.3981	-1.02843	0.171087	18123.7
						Kick0038	-668.115								ts2	-668.105	-668.135	-668.083	-668.054	-667.979		ts2	-0.409191	-1.21382	0.190646	0.98181	3.02266		-666.05	-666.06	-666.036	-666.011		-0.544169	-0.818898	-0.16386	0.503749	18123.7
						Kick0041	-668.118								g3	-668.103	-668.111	-668.098	-668.071	-668.014		g3	-0.357706	-0.58013	-0.219374	0.529661	2.07634		-666.053	-666.055	-666.044	-666.015		-0.622512	-0.683085	-0.387131	0.393134	18123.7
						Kick0092	-668.119								ts3	-668.113	-668.12	-668.098	-668.053	-668.01		ts4	-0.619186	-0.819408	-0.211735	1.02338	2.16973		-666.064	-666.058	-666.043	-666.032		-0.938874	-0.770407	-0.34977	-0.0543878	18123.7
						Kick0039	-668.122								g4	-668.115	-668.143	-668.098	-668.064	-667.981		g4	-0.666165	-1.43428	-0.21768	0.706297	2.97281		-666.063	-666.076	-666.06	-666.027		-0.898954	-1.2625	-0.822272	0.067248	18123.7
						Kick0071	-668.124								ts4	-668.115	-668.135	-668.112	-668.053	-668.01		ts4	-0.663451	-1.2138	-0.599041	1.01004	2.18327		-666.06	-666.077	-666.061	-666.021		-0.829701	-1.28359	-0.85996	0.226055	18123.7
						Kick0067	-668.124								g5	-668.095	-668.139	-668.128	-668.075	-668.014		g5	-0.122643	-1.33499	-1.03325	0.417722	2.07634		-666.029	-666.073	-666.059	-666.022		0.0309205	-1.16604	-0.805891	0.215742	18123.7
						Kick0093	-668.129								ts5	-668.094	-668.126	-668.113	-668.082	-667.994		ts5	-0.0918741	-0.979957	-0.613957	0.23321	2.60874		-666.053	-666.06	-666.05	-666.03		-0.634131	-0.821945	-0.560551	0.00174971	18123.7
						Kick0000	-668.133								g6	-668.109	-668.12	-668.119	-668.077	-668.02		g6	-0.524702	-0.810913	-0.783383	0.351958	1.92018		-666.059	-666.066	-666.063	-666.023		-0.801265	-0.993242	-0.906437	0.185482	18123.7
						Kick0051	-668.135								ts6	-668.09	-668.087	-668.087	-668.049	-668.01		ts6	0.00875892	0.0801699	0.0734371	1.11032	2.19336		-666.036	-666.033	-666.018	-665.995		-0.174799	-0.0913412	0.308642	0.937856	18123.7
						Kick0045	-668.135								g7	-668.135	-668.143	-668.145	-668.102	-668.028		g7	-1.21822	-1.44763	-1.48901	-0.326934	1.69715		-666.094	-666.096	-666.086	-666.048		-1.74641	-1.80437	-1.52888	-0.511189	18123.7
															ts7	-667.959	-667.971	-667.969	-667.939	-667.898		ts7	3.58129	3.25258	3.3054	4.10239	5.23039		-665.924	-665.932	-665.917	-665.89		2.8831	2.65434	3.07791	3.81075	18123.7
															g8	-667.986	-668.019	-668.017	-668.003	-667.958		g8	2.83664	1.94798	1.98288	2.36845	3.6097		-665.997	-665.975	-665.967	-665.94		0.879705	1.48519	1.69428	2.43564	18123.7
																r(CO)	r(CO)	theta(OCO)	v_bend	v_bend	v_symm_stretch	v_asym_stretch	v_imag	E(HOMO)	E(LUMO)	q(M4)	q(CO2)	E_ads	E_int
															M4									-0.23447	-0.16185
															g1	1.184	1.193	178.47	566.668	588.158	1280.4	2329.69		-0.2227	-0.15535	-0.114181	0.113938	-0.430035	-0.432568
															ts1	1.214	1.29	145.65	561.58	649.577	1084.47	1867.86	-14.5156	-0.23777	-0.18988	0.249893	-0.24985	-0.646757	0.264772
															g2	1.241	1.309	133.97	584.567	751.547	1107.99	1664.73		-0.25121	-0.19197	0.313099	-0.313083	-1.20682	0.174034
															ts2	1.243	1.243	147.19	575.265	642.89	1156.92	1820.05	-66.167	-0.25998	-0.19101	0.292647	2.3e-05	-0.409191	5.3761
															g3	1.236	1.328	132.39	550.682	730.892	1017.02	1673.01		-0.26067	-0.20395	0.267565	-0.267672	-0.357706	1.2545
															ts3	1.254	1.254	145.12	435.289	604.466	1093.68	1768.47	-140.111	-0.25161	-0.18761	0.198525	-0.383393	-0.619186	5.51523
															g4	1.21	1.283	147.04	564.889	627.049	1093.61	1900.95		-0.2536	-0.18818	0.229814	-0.229915	-0.666165	0.317042
															ts4	1.22	1.296	144.37	543.487	674.533	1075.51	1827.55	-21.7965	-0.24273	-0.20143	0.290254	-0.290271	-0.663451	5.38005
															g5	1.258	1.416	120.78	512.806	734.456	830.525	1492.56		-0.23566	-0.18256	0.366995	-0.366855	-0.122643	2.82489
															ts5	1.222	5.022	124.42	460.859	753.165	865.241	1691.47	-34.8791	-0.257	-0.20872	0.374604	-0.374606	-0.0918741	7.03579
															g6	1.213	3.18	101.37	474.061	692.771	828.435	1751.8		-0.24851	-0.19505	0.409699	-0.409728	-0.524702	7.07065
															ts6	1.187	1.962	110.44	463.868	499.778	742.492	1916.86	-372.417	-0.26373	-0.19408	0.300285	-0.300429	0.00875892	7.56188
															g7	1.176	4.847	115.97	442.988	527.078	857.429	2015.22		-0.2604	-0.20062	0.249904	-0.249879	-1.21822	6.5576
															ts7	2.111	3.195	115.18	501.285	724.333	775.382	813.776	-300.255	-0.25739	-0.2122	0.567743	-0.567766	3.58129	10.4326
															g8	3.158	4.264	90.43	576.022	824.496	860.414	861.372		-0.27598	-0.21744	0.583461	-0.583593	2.83664	23.3557
																							q(M4)	q(CO2)		E(M4)	E(CO2)	E_int
																q(M)				q(C)	q(O)	q(O)
															M4	-3e-06	-5e-06	-3e-06	-5e-06	0.327958	-0.163971	-0.163971
															g1	-0.044779	-0.023059	-0.028088	-0.018255	0.353143	-0.124654	-0.114551	-0.114181	0.113938		-479.167	-188.922	-0.432568
															ts1	0.032103	0.067579	0.073015	0.077196	0.181346	-0.223954	-0.207242	0.249893	-0.24985		-479.161	-188.882	0.264772
															g2	-0.037359	0.08691	0.121661	0.141887	0.150892	-0.223405	-0.24057	0.313099	-0.313083		-479.15	-188.854	0.174034
															ts2	0.063707	0.027219	0.063673	0.138048	0.172163	-0.232376	-0.232411	0.292647	2.3e-05		-479.138	-188.681	5.3761
															g3	0.063372	0.1229	0.123229	-0.041936	0.140022	-0.226705	-0.180989	0.267565	-0.267672		-479.151	-188.847	1.2545
															ts3	0.106795	0.106795	-0.007507	-0.007558	0.184837	-0.191679	-0.191714	0.198525	-0.383393		-479.151	-188.681	5.51523
															g4	-0.002703	0.031581	0.079452	0.121484	0.186551	-0.208159	-0.208307	0.229814	-0.229915		-479.167	-188.886	0.317042
															ts4	0.080611	0.080611	0.128488	0.000544	0.166252	-0.212514	-0.244009	0.290254	-0.290271		-479.148	-188.681	5.38005
															g5	0.191633	0.086452	0.080998	0.007912	0.0939	-0.27012	-0.190635	0.366995	-0.366855		-479.148	-188.795	2.82489
															ts5	0.136582	0.117227	0.119634	0.001161	0.054349	-0.182783	-0.246172	0.374604	-0.374606		-479.134	-188.627	7.03579
															g6	0.035982	0.125939	0.036036	0.211742	0.059869	-0.17481	-0.294787	0.409699	-0.409728		-479.149	-188.624	7.07065
															ts6	0.102192	-0.01112	0.009326	0.199887	-0.150007	0.125412	-0.275834	0.300285	-0.300429		-479.149	-188.627	7.56188
															g7	0.146352	-0.022653	0.061705	0.0645	0.112675	-0.114283	-0.248271	0.249904	-0.249879		-479.157	-188.627	6.5576
															ts7	0.025702	0.127852	0.21074	0.203449	-0.037459	-0.247049	-0.283258	0.567743	-0.567766		-479.151	-188.654	10.4326
															g8	0.040487	0.156755	0.162201	0.224018	-0.058543	-0.236641	-0.288409	0.583461	-0.583593		-479.133	-188.134	23.3557

## Sheet: Ag4
B3P86/sdd
a.u. to eV	27.2116
CO2	-188.923																												-188.695
Zero	-778.76
Pd4		assoc_CO2		chair_CO2		dissoc_CO2		chair_CO2_TS
Kick0999	-589.802	Kick0067	-778.75	Kick0003	-778.711	Kick0004	-778.667	Kick0022	-778.528
Kick0005	-589.829	Kick0050	-778.763	Kick0082	-778.763	Kick0060	-778.67	Kick0076	-778.55
Kick0017	-589.829	Kick0020	-778.764	Kick0019	-778.763	Kick0076	-778.678	Kick0015	-778.676
Kick0035	-589.83	Kick0089	-778.764	Kick0005	-778.764	Kick0078	-778.684	Kick0080	-778.733
Kick0026	-589.837	Kick0058	-778.764	Kick0094	-778.77	Kick0050	-778.696	Kick0062	-778.733
		Kick0071	-778.77	Kick0062	-778.77	Kick0000	-778.699	Kick0025	-778.761
		Kick0003	-778.77	Kick0047	-778.77	Kick0088	-778.711
		Kick0017	-778.77	Kick0063	-778.77	Kick0019	-778.72
		Kick0085	-778.77			Kick0058	-778.72
		Kick0047	-778.77			Kick0073	-778.722
						Kick0093	-778.733
						Kick0047	-778.733
						Kick0036	-778.764								B3P86/sdd														TPSSTPSS/Def2TZVP
						Kick0005	-778.764																E_ads
						Kick0038	-778.769									0,1	0,3	0,5	0,7	0,9			0,1	0,3	0,5	0,7	0,9
						Kick0051	-778.77								Ag4	-589.837	-589.812	-589.705	-589.479	-589.235									-587.831	-587.806	-587.699	-587.498
															Ag4 + CO2	-778.76	-778.735	-778.628	-778.402	-778.158			0	0.672461	3.59099	9.74766	16.3806		-776.525	-776.5	-776.393	-776.192		0	0.688998	3.59275	9.07099
															g1	-778.77	-778.737	-778.63	-778.407	-778.177		g1	-0.269122	0.61173	3.52235	9.60494	15.8482		-776.534	-776.507	-776.399	-776.199		-0.224569	0.492184	3.44818	8.89077
															ts1	-778.761	-778.728	-778.625	-778.479	-778.303		ts1	-0.0308401	0.869614	3.66523	7.62907	12.4401		-776.521	-776.49	-776.391	-776.239		0.12129	0.96621	3.66968	7.78272
															g2	-778.764	-778.74	-778.636	-778.483	-778.312		g2	-0.11958	0.542621	3.36193	7.51923	12.195		-776.534	-776.491	-776.401	-776.247		-0.224569	0.938182	3.39974	7.577
																r(CO)	r(CO)	theta(OCO)	v_bend	v_bend	v_symm_stretch	v_asym_stretch	v_imag	E(HOMO)	E(LUMO)	q(M4)	q(CO2)	E_ads	E_int
															M4									-0.19871	-0.13205
															g1	1.185	1.191	179.76	599.043	606.027	1292.04	2330.81		-0.19227	-0.11503	-0.087007	0.08697	-0.269122	-0.269261
															ts1	1.208	1.229	152.91	436.15	508.512	1154.06	2026.43	-128.614	-0.21048	-0.13477	0.150808	-0.150616	-0.0308401	0.483593
															g2	1.23	1.253	141.94	511.532	603.27	1156.37	1826.62		-0.22555	-0.14197	0.291904	-0.291507	-0.11958	0.823327
																							q(M4)	q(CO2)		E(M4)	E(CO2)	E_int
																q(M)				q(C)	q(O)	q(O)
															M4	-0.107444	0.110869	-0.107453	0.110479	0.327958	-0.163971	-0.163971
															g1	-0.122455	0.084255	-0.136212	0.087405	0.352132	-0.133542	-0.13162	-0.087007	0.08697		-589.837	-188.923	-0.269261
															ts1	-0.043762	0.136142	-0.032205	0.090633	0.230998	-0.199068	-0.182546	0.150808	-0.150616		-589.836	-188.902	0.483593
															g2	0.043621	0.183394	0.023937	0.040952	0.173871	-0.236875	-0.228503	0.291904	-0.291507		-589.83	-188.881	0.823327

## Sheet: M4 E_capture
		Capture	Associative (OCO)	O,CO	O,C,O		v_asym_stretch	v_imag	E(HOMO)	E(LUMO)
	Nb4	-0.290617	-2.42492	-4.60058	-6.61425		2316.88		-0.1557	-0.08467
	Mo4	-0.236912	-1.75252	-3.27466	-4.66587		2333.39		-0.14407	-0.08817
	Ru4	-0.483327	-2.00523	-2.94928	-1.41016		2323.65		-0.18025	-0.12753
	Rh4	-0.349313	-0.935508	-1.12286	0.794089		2322.03		-0.19903	-0.11026
	Pd4	-0.333247	-0.947545	-0.802437	3.30221		2322.28		-0.20193	-0.15599
	Ag4	-0.269122	-0.269122				2329.69		-0.2227	-0.15535
	Pt4	-0.430035	-1.20682	-1.21822	2.83664		2330.81		-0.19227	-0.11503

## Sheet: g1 vibs
							a.u.			eV
		bend	bend	symm stretch	asym stretch		E(pi_u)	DeltaE		E(pi_u)	DeltaE		Outcome			v_asym_stretch	g1 q(CO2)	ts1 q(CO2)	E(HOMO)	E(LUMO)						delta(HOMO)	delta(LUMO)
CO2		622	622	1283	2319		-0.0328	0		-0.89254	0
Nb4		546	547	1256	2317		-0.08467	-0.05187		-2.30401	-1.41147		O+C+O		Nb4	2316.88	0.097666	-0.57743	-0.1557	-0.08467	0.097666	-4.23685	-2.30401		-0.07103	0.00974	0.00396	O+C+O
Mo4		471	540	1251	2333		-0.08817	-0.05537		-2.39925	-1.50671		O+C+O		Mo4	2333.39	0.096846	-0.48795	-0.14407	-0.08817	0.096846	-3.92038	-2.39925		-0.0559	0.0318	0.00971	O+C+O
Ru4		527	579	1268	2324		-0.07866	-0.04586		-2.14046	-1.24792		O+CO		Ru4	2323.65	0.124712	-0.354308	-0.18025	-0.12753	0.124712	-4.90489	-3.4703		-0.05272	0.00933	0.01093	O+CO
Rh4		572	587	1275	2322		-0.0512	-0.0184		-1.39323	-0.500693		CO2		Rh4	2322.03	0.097	-0.298619	-0.19903	-0.11026	0.097	-5.41592	-3.00035		-0.08877	0.00823	0.00323	CO2
Pd4		581	585	1277	2322		-0.05504	-0.02224		-1.49773	-0.605186		CO2		Pd4	2322.28	0.080028	-0.006437	-0.20193	-0.15599	0.080028	-5.49484	-4.24474		-0.04594	0.00808	0.00823	CO2
Ag4		599	606	1292	2331		-0.06696	-0.03416		-1.82209	-0.929548		CO2		Ag4	2329.69	0.08697	-0.150616	-0.19227	-0.11503	0.08697	-5.23197	-3.13015		-0.07724	0.00644	0.01702	CO2
Pt4		567	588	1280	2330		-0.06603	-0.03323		-1.79678	-0.904241		CO2, O+CO		Pt4	2330.81	0.113938	-0.24985	-0.2227	-0.15535	0.113938	-6.06002	-4.22732		-0.06735	0.01177	0.0065	CO2, O+CO
Nb4		-76	-75	-27	-2
Mo4		-151	-82	-32	14
Ru4		-95	-43	-15	5
Rh4		-50	-35	-8	3
Pd4		-41	-37	-6	3
Ag4		-23	-16	9	12
Pt4		-55	-34	-3	11
									E(O--CO)	E(C--O)
Nb4		-75.5	-76		O+C+O			Nb4	-1.55159	-3.67004
Mo4		-116.5	-151		O+C+O			Mo4	-1.115	-1.77221
Ru4		-69	-95		O+CO			Ru4	-1.62219	-0.647538
Rh4		-42.5	-50		CO2			Rh4	0.515965	1.41744
Pd4		-39	-41		CO2			Pd4	0.275845	3.41546
Ag4		-19.5	-23		CO2			Ag4
Pt4		-44.5	-55		CO2, O+CO			Pt4	-0.122643	3.58129
