# Supplementary material for: Associative vs. dissociative binding of CO 2 on M 4 transition metal clusters
Source: Royal Society of Chemistry journal article supplement (doi:10.1039/d5cp03419a), 2025-12-09
Supplement: d5cp03419a4.zip [file M4+M5_neutral.xlsx]

## Sheet: Nb4
B3P86/sdd
a.u. to eV	27.2116
CO2	-188.923
											Triplet							31 is another path from vertex
Nb4		assoc_CO2		chair_CO2		dissoc_CO2		chair_CO2_TS			Nb4								Kick0077_step104_GO	-418.004
Kick0996	-228.594	Kick0050	-417.846	Kick0041	-417.846	Kick0001	-417.871	Kick0052	-417.735		-228.887	Kick0050							Kick0077_step11_GO	-418.004
Kick0997	-228.757	Kick0042	-417.846	Kick0087	-417.846	Kick0050	-417.9	Kick0055	-417.782		-228.898	Kick0999							Kick0077_step22_GO	-418.004
Kick0995	-228.79	Kick0026	-417.924	Kick0042	-417.846	Kick0005	-417.922	Kick0037	-417.839										Kick0077_step34_GO	-418.004
Kick0059	-228.853	Kick0078	-417.972	Kick0031	-417.868	Kick0035	-417.924	Kick0079	-417.845
Kick0087	-228.856	Kick0070	-417.985	Kick0090	-417.875	Kick0061	-417.934	Kick0042	-417.845					Phys	Kick0042	-417.846
Kick0038	-228.867	Kick0058	-417.985	Kick0012	-417.884	Kick0039	-417.943	Kick0092	-417.846						TS-0037				Kick0077_step104_TS	-417.994
Kick0046	-228.867	Kick0097	-417.994	Kick0018	-417.89	Kick0000	-417.945	Kick0090	-417.866						TS-37-f				Kick0077_step11_TS	-417.892
Kick0021	-228.867	Kick0066	-417.994	Kick0053	-417.907	Kick0029	-417.946	Kick0002	-417.868						TS-0077				Kick0077_step22_TS	-417.892
Kick0066	-228.867	Kick0035	-418.002	Kick0039	-417.924	Kick0068	-417.951	Kick0050	-417.869						TS-77 r				Kick0077_step34_TS	-417.972
Kick0076	-228.869	Kick0075	-418.003	Kick0032	-417.934	Kick0054	-417.951	Kick0047	-417.878
Kick0012	-228.869	Kick0069	-418.063	Kick0003	-417.975	Kick0012	-417.967	Kick0027	-417.882						TS-77-f
Kick0035	-228.88	Kick0088	-418.065	Kick0098	-417.997	Kick0006	-417.97	Kick0089	-417.885
Kick0050	-228.913	Kick0016	-418.071	Kick0026	-418.002	Kick0008	-417.98	Kick0034	-417.886
Kick0026	-228.913	Kick0023	-418.086	Kick0035	-418.004	Kick0089	-417.983	Kick0048	-417.887
				Kick0013	-418.004	Kick0080	-417.985	Kick0018	-417.889						0,1	0,3	0,5	0,7
	-0.880295			Kick0048	-418.013	Kick0088	-417.986	Kick0085	-417.89					Nb4	-228.913	-228.898	-228.87	-228.836
				Kick0027	-418.06	Kick0011	-417.994	Kick0031	-417.891					Nb4 + CO2	-417.835	-417.821	-417.792	-417.759		0	0.398835	1.17138	2.07461
				Kick0071	-418.063	Kick0004	-417.994	Kick0013	-417.892					g1	-417.846	-417.897	-417.874	-417.849		-0.290617	-1.68414	-1.04007	-0.37407
				Kick0020	-418.077	Kick0027	-417.997	Kick0077	-417.892					ts1	-417.839	-417.853	-417.842	-417.81		-0.0941113	-0.469819	-0.187774	0.68371
				Kick0069	-418.086	Kick0021	-418.002	Kick0012	-417.895					g2	-417.924	-417.912	-417.885	-417.86		-2.42492	-2.10008	-1.36122	-0.66214
						Kick0046	-418.003	Kick0028	-417.911					ts2	-417.892	-417.891	-417.882	-417.85		-1.55159	-1.50338	-1.26493	-0.399066
						Kick0087	-418.004	Kick0032	-417.916					g3	-418.004	-418.011	-417.984	-417.948		-4.60058	-4.79343	-4.05178	-3.06098
						Kick0094	-418.004	Kick0003	-417.937					ts3	-417.97	-417.972	-417.955	-417.946		-3.67004	-3.73321	-3.25037	-3.02294
						Kick0084	-418.004	Kick0071	-417.94					g4	-418.078	-418.08	-418.055	-418.017		-6.61425	-6.65127	-5.98494	-4.94788
						Kick0003	-418.008	Kick0081	-417.965				ts10	ts4	-417.975					-3.80713	11370	11370	11370
						Kick0085	-418.013						g_ts10f	g5	-418.013					-4.83332	11370	11370	11370
						Kick0083	-418.066						ts12	ts5	-417.97					-3.67004	11370	11370	11370
						Kick0047	-418.068						g12	g6	-418.078					-6.61425	11370	11370	11370
						Kick0082	-418.071
						Kick0019	-418.076
						Kick0028	-418.078								neutral singlet	DeltaE
															(a.u.)	(eV)
														Nb4	-228.913
														CO2	-188.923
														Nb4 + CO2	-417.835	0				50	40.0291	20.7155	-1.86524
														g1	-417.846	-0.290617				57.2654	92.1036	76.0017	59.3517
														ts1	-417.839	-0.0941113				52.3528	61.7455	54.6943	32.9072
														g2	-417.924	-2.42492				110.623	102.502	84.0306	66.5535
														ts2	-417.892	-1.55159				88.7899	87.5844	81.6231	59.9767
														g3	-418.004	-4.60058				165.015	169.836	151.294	126.525
														ts3						141.751	143.33	131.259	125.573
						1.185	1.194							g4						215.356	216.282	199.623	173.697
						1.208	1.233							ts4
						1.295	1.295							g5
						1.285	1.339							ts5
						1.322	3.285							g6
																	v_imag
														g1	1.185	1.194
														ts1	1.208	1.233	-99.5722
														g2	1.295	1.295
														ts2	1.285	1.339	-114.86
														g3	1.322	3.285
														ts3	1.891	4.344	-406.871
														g4	3.16	4.641
														ts4	1.409	4.151	-246.472
														g5	1.41	3.92
														ts5	1.891	4.344	-406.866
														g6	3.16	4.641

## Sheet: Mo4
B3P86/sdd
a.u. to eV	27.2116
CO2	-188.923
Zero	-462.855
Mo4		assoc_CO2		chair_CO2		dissoc_CO2		chair_CO2_TS
Kick0996	-273.628	Kick0082	-462.864	Kick0060	-462.855	Kick0099	-462.71	Kick0086	-462.854					orig name	new name
Kick0997	-273.813	Kick0067	-462.877	Kick0073	-462.877	Kick0047	-462.735	Kick0049	-462.859					g_p2_restart	g1
Kick0995	-273.883	Kick0076	-462.877	Kick0083	-462.878	Kick0098	-462.814	Kick0033	-462.868					ts_phys1	ts1
Kick0994	-273.897	Kick0021	-462.877	Kick0041	-462.89	Kick0080	-462.863	Kick0073	-462.871					g_p7	g2
Kick0001	-273.899	Kick0047	-462.877	Kick0086	-462.894	Kick0013	-462.865	Kick0078	-462.875					ts_p7	ts2
Kick0027	-273.899	Kick0019	-462.878	Kick0031	-462.894	Kick0053	-462.87	Kick0017	-462.876					irc_r_p3r	g3
Kick0024	-273.899	Kick0072	-462.885	Kick0051	-462.901	Kick0079	-462.874	Kick0099	-462.877					ts_pre_40-3	ts3
Kick0040	-273.899	Kick0043	-462.887	Kick0053	-462.901	Kick0064	-462.877	Kick0020	-462.877					g_p4	g4
Kick0082	-273.899	Kick0003	-462.898	Kick0037	-462.905	Kick0077	-462.877	Kick0038	-462.878					ts_p15	ts4
Kick0999	-273.899	Kick0062	-462.899	Kick0024	-462.905	Kick0028	-462.878	Kick0080	-462.884					pre_81	g5
Kick0087	-273.922	Kick0060	-462.901	Kick0038	-462.912	Kick0063	-462.881	Kick0053	-462.89					ts_p11	ts5
Kick0051	-273.922	Kick0002	-462.905	Kick0079	-462.916	Kick0083	-462.883	Kick0066	-462.892					d40	g6
Kick0026	-273.922	Kick0016	-462.906	Kick0039	-462.917	Kick0055	-462.883	Kick0007	-462.892
Kick0050	-273.932	Kick0026	-462.916	Kick0072	-462.919	Kick0088	-462.893	Kick0048	-462.893
Kick0031	-273.932	Kick0096	-462.916	Kick0028	-462.926	Kick0061	-462.894	Kick0008	-462.894
Kick0039	-273.932	Kick0048	-462.917	Kick0026	-462.926	Kick0023	-462.898	Kick0082	-462.896						0,1	0,3	0,5	0,7
Kick0047	-273.932	Kick0039	-462.919	Kick0088	-462.945	Kick0096	-462.899	Kick0009	-462.902					Mo4	-273.933	-273.917	-273.911	-273.868
Kick0076	-273.932	Kick0064	-462.919	Kick0045	-462.946	Kick0062	-462.903	Kick0012	-462.903					Mo4 + CO2	-462.855	-462.839	-462.833	-462.791		0	0.430569	0.59761	1.74346
Kick0025	-273.932	Kick0050	-462.926	Kick0066	-462.947	Kick0006	-462.906	Kick0094	-462.913					g1	-462.864	-462.862	-462.852	-462.846	g1	-0.236912	-0.180979	0.0891566	0.250427
Kick0044	-273.933	Kick0081	-462.932	Kick0087	-462.96	Kick0007	-462.912	Kick0011	-462.923					ts1	-462.863	-462.862	-462.907	-462.845	ts1	-0.221392	-0.180047	-1.40065	0.260446
		Kick0034	-462.939	Kick0034	-462.961	Kick0089	-462.913							g2	-462.919	-462.929	-462.932	-462.914	g2	-1.75252	-2.00534	-2.08871	-1.59927
		Kick0005	-462.942	Kick0043	-462.966	Kick0095	-462.919							ts2	-462.896	-462.908	-462.898	-462.873	ts2	-1.115	-1.44113	-1.15971	-0.477854
		Kick0063	-462.945	Kick0040	-462.969	Kick0042	-462.926							g3	-462.975	-462.993	-462.979	-462.966	g3	-3.27466	-3.73996	-3.38484	-3.02629
		Kick0007	-462.947	Kick0006	-463.003	Kick0005	-462.929							ts4	-462.961	-462.974	-462.972	-462.947	ts4	-2.88693	-3.22765	-3.18972	-2.50312
		Kick0094	-462.948			Kick0025	-462.93							g4	-462.969	-462.971	-462.983	-462.955	g4	-3.1018	-3.15142	-3.47989	-2.7285
		Kick0084	-462.956			Kick0057	-462.93							ts4	-462.961	-462.974	-462.972	-462.947	ts4	-2.88693	-3.22765	-3.18972	-2.50312
		Kick0025	-462.969			Kick0026	-462.937							g5	-462.964	-462.965	-462.961	-462.964	g5	-2.95168	-2.98212	-2.89531	-2.96841
						Kick0084	-462.939							ts5	-462.92	-462.941	-462.952	-462.92	ts5	-1.77221	-2.34344	-2.64514	-1.76858
						Kick0021	-462.942							g6	-463.027	-463.041	-463.022	-462.992	g6	-4.66587	-5.06513	-4.54784	-3.71871
						Kick0018	-462.942
						Kick0049	-462.942
						Kick0068	-462.943													50	39.2358	35.0597	6.41355
						Kick0008	-462.945												g1	55.9228	54.5245	47.7711	43.7393
						Kick0035	-462.945												ts1	55.5348	54.5012	85.0162	43.4889
						Kick0074	-462.947												g2	93.8131	100.134	102.218	89.9816
						Kick0045	-462.947												ts2	77.8751	86.0283	78.9928	61.9463
						Kick0056	-462.947												g3	131.867	143.499	134.621	125.657
						Kick0037	-462.951												ts4	122.173	130.691	129.743	112.578
						Kick0058	-462.952												g4	127.545	128.785	136.997	118.213
						Kick0039	-462.956												ts4	122.173	130.691	129.743	112.578
						Kick0069	-462.959												g5	123.792	124.553	122.383	124.21
						Kick0036	-462.959												ts5	94.3052	108.586	116.129	94.2145
						Kick0086	-462.96												g6	166.647	176.628	163.696	142.968
						Kick0070	-462.961
						Kick0090	-462.962
						Kick0015	-462.962							g1	1.187	1.192
						Kick0081	-462.964							ts1	1.182	1.196	-61.1649
						Kick0014	-462.966							g2	1.248	1.372
						Kick0087	-462.968							ts2	1.187	1.993	-387.531
						Kick0017	-462.969							g3	1.231	3.363
						Kick0011	-463.026							ts4	1.222	3.461	-97.7903
						Kick0040	-463.027							g4	1.251	3.095
														ts4	1.222	3.461	-296.914
														g5	1.352	3.9
														ts5	2.078	4.169	-384.973
														g6	3.242	4.326

## Sheet: Ru4
B3P86/sdd																			v_imag
a.u. to eV	27.2116														orig name	new name
CO2	-188.923
Zero	-569.854													~same	a89
															03_irc_f	g1
Ru4		assoc_CO2		chair_CO2		dissoc_CO2		chair_CO2_TS							ts03	ts1
Kick0996	-380.838	Kick0091	-569.862	Kick0010	-569.869	Kick0017	-569.863	Kick0029	-569.684						60_irc_r	g2
Kick0997	-380.84	Kick0004	-569.872	Kick0053	-569.872	Kick0037	-569.869	Kick0007	-569.735						ts60	ts2					over face path
Kick0017	-380.86	Kick0035	-569.872	Kick0035	-569.91	Kick0021	-569.878	Kick0076	-569.765						26_irc_f	g3					g53f	-632.763	-1711.84
Kick0051	-380.86	Kick0089	-569.872	Kick0015	-569.926	Kick0034	-569.88	Kick0003	-569.833						ts26	ts3					ts61	-632.702	-1710.2
Kick0994	-380.875	Kick0013	-569.883	Kick0066	-569.927	Kick0040	-569.91	Kick0074	-569.843						26_irc_r	g4
Kick0026	-380.92	Kick0011	-569.888	Kick0013	-569.927	Kick0048	-569.913	Kick0057	-569.848						qst	ts4
Kick0070	-380.924	Kick0039	-569.91	Kick0031	-569.928	Kick0007	-569.916	Kick0010	-569.853						47_irc_f	g5
Kick0095	-380.924	Kick0015	-569.914	Kick0021	-569.928	Kick0036	-569.923	Kick0014	-569.858						qst	ts5
Kick0071	-380.924	Kick0026	-569.928	Kick0047	-569.948	Kick0039	-569.925	Kick0093	-569.859						d35	g6
Kick0087	-380.924	Kick0032	-569.938	Kick0007	-569.948	Kick0023	-569.926	Kick0061	-569.868
Kick0054	-380.924	Kick0006	-569.938	Kick0026	-569.963	Kick0018	-569.927	Kick0090	-569.871
Kick0002	-380.924	Kick0081	-569.943			Kick0000	-569.928	Kick0069	-569.872
Kick0003	-380.924	Kick0025	-569.959			Kick0019	-569.934	Kick0042	-569.872							1	3	5	7	9	11	13	15		1	3	5	7	9	11	13	15
Kick0050	-380.924					Kick0042	-569.942	Kick0023	-569.877						Ru4	-380.932	-380.957	-380.972	-380.977	-381.001	-380.984	-381.001	-380.956
Kick0033	-380.924					Kick0026	-569.943	Kick0024	-569.877						Ru4+ CO2	-569.854	-569.88	-569.894	-569.9	-569.924	-569.906	-569.923	-569.879		0	-0.696696	-1.08756	-1.23701	-1.89538	-1.4112	-1.87803	-0.66429
Kick0085	-380.924					Kick0047	-569.947	Kick0047	-569.878						g1	-569.872	-569.908	-569.916	-569.921	-569.936	-569.924	-569.918	-569.889	g1	-0.483327	-1.45633	-1.68017	-1.81551	-2.21559	-1.89422	-1.72831	-0.95851
Kick0047	-380.924					Kick0024	-569.948	Kick0068	-569.881						ts1	-569.833	-569.883	-569.879	-569.893	-569.935	-569.912	-569.908	-569.861	ts1	0.57395	-0.792543	-0.677708	-1.0422	-2.19436	-1.57967	-1.47235	-0.172204
Kick0010	-380.929					Kick0029	-569.948	Kick0026	-569.892						g2	-569.91	-569.959	-569.958	-569.967	-569.964	-569.988	-569.934	-569.911	g2	-1.50982	-2.85597	-2.82507	-3.06449	-2.9941	-3.62699	-2.18274	-1.55698
Kick0995	-380.931					Kick0038	-569.948	Kick0060	-569.894						ts2	-569.894	-569.945	-569.945	-569.954	-569.961	-569.94	-569.934	-569.894	ts2	-1.07618	-2.48039	-2.48317	-2.71011	-2.90476	-2.33455	-2.1608	-1.07778
Kick0012	-380.931					Kick0022	-569.948	Kick0071	-569.897						g3	-569.91	-569.959	-569.958	-569.967	-569.964	-569.988	-569.934	-569.911	g3	-1.50981	-2.85597	-2.82507	-3.06449	-2.9941	-3.627	-2.18274	-1.55695
Kick0038	-380.932					Kick0011	-569.952								ts3	-569.892	-569.934	-569.937	-569.941	-569.947	-569.934	-569.934	-569.894	ts3	-1.02099	-2.16916	-2.24449	-2.3623	-2.51946	-2.16518	-2.16079	-1.07778
Kick0058	-380.932					Kick0013	-569.958								g4	-569.928	-569.962	-569.955	-569.962	-569.965	-569.966	-569.945	-569.905	g4	-2.00523	-2.93612	-2.72955	-2.92714	-3.02566	-3.03992	-2.4747	-1.3946
						Kick0035	-569.963								ts4	-569.914	-569.94	-569.938	-569.931	-569.948	-569.93	-569.907	-569.908	ts4	-1.62219	-2.34697	-2.28783	-2.09846	-2.5615	-2.06998	-1.444	-1.45897
															g5	-569.948	-569.984	-569.991	-569.985	-569.979	-569.966	-569.955	-569.946	g5	-2.5565	-3.52347	-3.71498	-3.56758	-3.3936	-3.03578	-2.73536	-2.50852
															ts5	-569.944	-569.982	-569.963	-569.982	-569.967	-569.96	-569.936	-569.926	ts5	-2.45508	-3.46719	-2.95741	-3.4764	-3.07636	-2.86819	-2.23172	-1.96125
															g6	-569.963	-569.994	-569.991	-569.986	-569.992	-569.966	-569.966	-569.949	g6	-2.94928	-3.8074	-3.71498	-3.57593	-3.74679	-3.03577	-3.05484	-2.58772
															ts6	-569.946	-569.971	-569.979	-569.981	-569.977	-569.956	-569.934	-569.916	ts6	-2.49714	-3.18911	-3.40738	-3.4422	-3.34962	-2.7719	-2.177	-1.67982
															g7	-569.908	-569.989	-569.984	-569.986	-569.99	-569.993	-569.982	-569.931	g7	-1.4517	-3.66368	-3.52731	-3.59148	-3.70274	-3.78951	-3.48289	-2.08432
															ts7	-569.878	-569.896	-569.921	-569.878	-569.884	-569.961	-569.848	-569.903	ts7	-0.647538	-1.14818	-1.80496	-0.652069	-0.811434	-2.90067	0.166581	-1.31465
															g8	-569.906	-569.917	-569.936	-569.915	-569.935	-569.953	-569.893	-569.916	g8	-1.41016	-1.70101	-2.22461	-1.6462	-2.19156	-2.68283	-1.04681	-1.69116
																									50	67.4174	77.189	80.9254	97.3846	85.2799	96.9508	66.6072
																g1	1.185	1.192						g1	62.0832	86.4082	92.0043	95.3877	105.39	97.3554	93.2078	73.9628
																ts1	1.191	1.635	-560.274					ts1	35.6513	69.8136	66.9427	76.055	104.859	89.4917	86.8088	54.3051
																g2	1.219	1.326						g2	87.7454	121.399	120.627	126.612	124.852	140.675	104.569	88.9244
																ts2	1.253	1.288	-164.736					ts2	76.9045	112.01	112.079	117.753	122.619	108.364	104.02	76.9445
																g3	1.219	1.326						g3	87.7452	121.399	120.627	126.612	124.852	140.675	104.569	88.9238
																ts3	1.225	1.345	-130.12					ts3	75.5248	104.229	106.112	109.058	112.986	104.13	104.02	76.9445
																g4	1.234	1.396						g4	100.131	123.403	118.239	123.179	125.641	125.998	111.868	84.8649
																ts4	1.199	1.884	-407.849					ts4	90.5547	108.674	107.196	102.462	114.038	101.749	86.1	86.4742
																g5	1.183	3.535						g5	113.913	138.087	142.875	139.189	134.84	125.894	118.384	112.713
																ts5	1.185	3.893						ts5	111.377	136.68	123.935	136.91	126.909	121.705	105.793	99.0313
																g6	1.189	4.609						g6	123.732	145.185	142.875	139.398	143.67	125.894	126.371	114.693
																ts6	1.183	4.073	-103.498					ts6	112.429	129.728	135.184	136.055	133.741	119.297	104.425	91.9955
																g7	1.304	3.626						g7	86.2925	141.592	138.183	139.787	142.569	144.738	137.072	102.108
																ts7	1.426	3.745	-631.931					ts7	66.1885	78.7044	95.1241	66.3017	70.2858	122.517	45.8355	82.8662
																g8	3.177	3.206						g8	85.2541	92.5253	105.615	91.1549	104.789	117.071	76.1701	92.279

## Sheet: Rh4
B3P86/sdd																			v_imag
a.u. to eV	27.2116
CO2	-188.923														orig name	new name
Zero	-632.714														ak0026	g1	-632.727	-0.349318
															ts68	ts1	-632.727	-0.351413	-45.44
Rh4		assoc_CO2		chair_CO2		dissoc_CO2		chair_CO2_TS						same	g68f		-632.749	-0.935483
Kick0996	-443.666	Kick0056	-632.692	Kick0057	-632.699	Kick0081	-632.667	Kick0047	-632.556						g53r	g2	-632.749	-0.937143
Kick0993	-443.73	Kick0084	-632.692	Kick0094	-632.722	Kick0076	-632.674	Kick0091	-632.559						ts53	ts2	-632.742	-0.756676	-255.53		over face path
Kick0087	-443.731	Kick0030	-632.707	Kick0004	-632.726	Kick0029	-632.676	Kick0030	-632.572												g53f	-632.763	-1.30945
Kick0079	-443.731	Kick0074	-632.717	Kick0058	-632.727	Kick0093	-632.692	Kick0074	-632.58												ts61	-632.702	0.328659
Kick0059	-443.731	Kick0026	-632.727	Kick0045	-632.73	Kick0077	-632.695	Kick0093	-632.58						g67r	g3	-632.749	-0.93551
Kick0063	-443.731	Kick0035	-632.749	Kick0046	-632.743	Kick0021	-632.697	Kick0075	-632.58						ts67	ts3	-632.696	0.515956	-464.22
Kick0043	-443.731	Kick0034	-632.751	Kick0050	-632.749	Kick0079	-632.697	Kick0029	-632.641						g67f	g4	-632.722	-0.204661
Kick0088	-443.736	Kick0038	-632.753	Kick0005	-632.749	Kick0014	-632.707	Kick0058	-632.65						g67f-g61f_qst3	ts4	-632.717	-0.0719502	-152.14
Kick0051	-443.736	Kick0037	-632.76	Kick0025	-632.76	Kick0086	-632.722	Kick0066	-632.653						g61f	g5	-632.756	-1.12286
Kick0050	-443.792	Kick0025	-632.763	Kick0083	-632.763	Kick0082	-632.727	Kick0063	-632.687
Kick0026	-443.792	Kick0071	-632.766	Kick0095	-632.763	Kick0047	-632.727	Kick0073	-632.691
Kick0042	-443.792	Kick0061	-632.771			Kick0037	-632.729	Kick0023	-632.695
Kick0999	-443.792					Kick0055	-632.732	Kick0067	-632.696							1	3	5	7	9
						Kick0035	-632.743	Kick0061	-632.702						Rh4	-443.792	-443.769	-443.765	-443.774	-443.771
						Kick0092	-632.746	Kick0076	-632.727						Rh4 + CO2	-632.714	-632.691	-632.687	-632.697	-632.694			0	0.632482	0.73572	0.485825	0.562951
						Kick0083	-632.749	Kick0018	-632.727						g1	-632.727	-632.721	-632.725	-632.736	-632.708		g1	-0.349313	-0.17715	-0.283333	-0.575368	0.1781
						Kick0050	-632.749	Kick0090	-632.727						ts1	-632.727	-632.727	-632.727	-632.741	-632.704		ts1	-0.351413	-0.33289	-0.340545	-0.714805	0.287254
						Kick0032	-632.75	Kick0004	-632.728						g2	-632.749	-632.761	-632.762	-632.771	-632.73		g2	-0.935508	-1.27533	-1.30172	-1.54564	-0.411619
						Kick0072	-632.752	Kick0037	-632.729						ts2	-632.742	-632.727	-632.736	-632.755	-632.728		ts2	-0.756681	-0.337696	-0.576731	-1.09722	-0.359969
						Kick0025	-632.756	Kick0081	-632.742						g3	-632.749	-632.761	-632.762	-632.771	-632.73		g3	-0.935508	-1.27533	-1.30172	-1.54564	-0.411616
						Kick0043	-632.759	Kick0053	-632.742						ts3	-632.696	-632.711	-632.717	-632.712	-632.705		ts4	0.515965	0.088386	-0.0629132	0.0604397	0.26026
						Kick0069	-632.76	Kick0068	-632.743						g4	-632.722	-632.748	-632.748	-632.747	-632.743		g4	-0.204664	-0.924381	-0.919355	-0.890053	-0.76248
						Kick0099	-632.76	Kick0005	-632.744						ts4	-632.717	-632.744	-632.737	-632.738	-632.732		ts4	-0.0719638	-0.811864	-0.622672	-0.627442	-0.481585
						Kick0005	-632.763	Kick0007	-632.758						g5	-632.756	-632.762	-632.765	-632.773	-632.752		g5	-1.12286	-1.28222	-1.36742	-1.60129	-1.032
						Kick0039	-632.763								ts5	-632.662	-632.67	-632.665	-632.671	-632.654		ts5	1.41744	1.20633	1.33414	1.19349	1.64046
						Kick0071	-632.765								g6	-632.685	-632.688	-632.689	-632.69	-632.683		g6	0.794089	0.720729	0.690214	0.666532	0.85824
						Kick0048	-632.766
						Kick0056	-632.766
						Kick0013	-632.78
						Kick0091	-632.78																50	34.188	31.607	37.8544	35.9262
															g1	1.186	1.192					g1	58.7328	54.4288	57.0833	64.3842	45.5475
															ts1	1.224	1.248	-45.4423				ts1	58.7853	58.3223	58.5136	67.8701	42.8187
															g2	1.256	1.269					g2	73.3877	81.8832	82.5429	88.6409	60.2905
															ts2	1.247	1.318	-255.523				ts2	68.917	58.4424	64.4183	77.4304	58.9992
															g3	1.256	1.269					g3	73.3877	81.8832	82.5429	88.6409	60.2904
															ts4	1.19	1.928	-464.217				ts4	37.1009	47.7904	51.5728	48.489	43.4935
															g4	1.178	3.371					g4	55.1166	73.1095	72.9839	72.2513	69.062
															ts4	1.179	3.205	-152.14				ts4	51.7991	70.2966	65.5668	65.6861	62.0396
															g5	1.224	3.101					g5	78.0715	82.0554	84.1855	90.0322	75.8
															ts5	1.986	3.27	-371.879				ts5	14.564	19.8417	16.6464	20.1627	8.98851
															g6	2.822	2.954					g6	30.1478	31.9818	32.7446	33.3367	28.544

## Sheet: Pd4
B3P86/sdd																			v_imag
a.u. to eV	27.2116
CO2	-188.923														orig name	new name
Zero	-702.255
																g1
Pd4		assoc_CO2		chair_CO2		dissoc_CO2		chair_CO2_TS							ts09	ts1
Kick0099	-513.315	Kick0086	-702.252	Kick0075	-702.163	Kick0006	-702.154	Kick0068	-702.106						irc_63_f	g2
Kick0041	-513.316	Kick0060	-702.266	Kick0037	-702.245	Kick0028	-702.161	Kick0036	-702.107						ts63	ts2
Kick0026	-513.316	Kick0026	-702.267	Kick0033	-702.256	Kick0070	-702.163	Kick0037	-702.149						a39	g3
Kick0994	-513.319	Kick0062	-702.268	Kick0028	-702.267	Kick0030	-702.201	Kick0081	-702.173						ts77	ts3
Kick0047	-513.332	Kick0014	-702.271	Kick0055	-702.278	Kick0039	-702.205	Kick0083	-702.216						irc_25_r	g4
Kick0072	-513.333	Kick0088	-702.272	Kick0064	-702.281	Kick0087	-702.205	Kick0057	-702.226						ts25	ts4
Kick0044	-513.333	Kick0000	-702.278	Kick0057	-702.281	Kick0021	-702.212	Kick0025	-702.245						irc_25_f	g5
Kick0004	-513.333	Kick0008	-702.281	Kick0001	-702.29	Kick0035	-702.214	Kick0098	-702.264						t_s99	ts5
Kick0058	-513.333	Kick0006	-702.281	Kick0050	-702.29	Kick0023	-702.222	Kick0063	-702.265						g98	g6
Kick0086	-513.333	Kick0025	-702.281			Kick0088	-702.225	Kick0004	-702.266						t_s98	ts7
Kick0078	-513.333	Kick0064	-702.284			Kick0072	-702.225	Kick0009	-702.267						g97	g7
		Kick0035	-702.29			Kick0052	-702.225	Kick0092	-702.27
		Kick0039	-702.29			Kick0051	-702.244	Kick0077	-702.272
						Kick0001	-702.244
						Kick0073	-702.244
						Kick0020	-702.245
						Kick0026	-702.245
						Kick0083	-702.245									1	3	5	7	9
						Kick0098	-702.246								Pd4	-513.333	-513.359	-513.308	-513.218	-513.12
						Kick0013	-702.25								Pd4 + CO2	-702.255	-702.282	-702.23	-702.141	-702.042			0	-0.728076	0.678437	3.11872	5.79206
						Kick0090	-702.25								g1	-702.267	-702.294	-702.242	-702.152	-702.045		g1	-0.333247	-1.04675	0.357487	2.80316	5.70536
						Kick0043	-702.25								ts1	-702.266	-702.293	-702.241	-702.152	-702.045		ts1	-0.298216	-1.02326	0.373345	2.8053	5.71209
						Kick0058	-702.259								g2	-702.267	-702.294	-702.242	-702.153	-702.047		g2	-0.333249	-1.04675	0.357494	2.76917	5.6656
						Kick0067	-702.259								ts2	-702.265	-702.29	-702.238	-702.156	-702.043		ts2	-0.256408	-0.943537	0.46474	2.68965	5.7625
						Kick0085	-702.267								g3	-702.29	-702.298	-702.262	-702.181	-702.077		g3	-0.947545	-1.16554	-0.198291	2.01721	4.85484
						Kick0059	-702.268								ts3	-702.272	-702.298	-702.237	-702.147	-702.042		ts4	-0.458687	-1.15942	0.482836	2.93669	5.7994
						Kick0092	-702.268								g4	-702.281	-702.306	-702.262	-702.183	-702.073		g4	-0.704782	-1.38335	-0.198286	1.97342	4.94874
						Kick0012	-702.271								ts4	-702.245	-702.245	-702.221	-702.186	-702.085		ts4	0.275845	0.268568	0.919515	1.88359	4.63002
						Kick0042	-702.272								g5	-702.285	-702.286	-702.255	-702.185	-702.106		g5	-0.802437	-0.840496	0.000974311	1.90091	4.05693
						Kick0091	-702.275								ts5	-702.257	-702.255	-702.242	-702.171			ts5	-0.0507876	0.0115096	0.357388	2.29116
						Kick0000	-702.278								g6	-702.259	-702.258	-702.255	-702.191			g6	-0.113976	-0.085253	-0.000458896	1.73574
						Kick0056	-702.279								ts6	-702.13	-702.124	-702.109	-702.076			ts6	3.41546	3.56242	3.98622	4.87163
						Kick0068	-702.281								g7	-702.134	-702.124	-702.115	-702.079			g7	3.30221	3.56029	3.82666	4.78052
						Kick0099	-702.281
						Kick0019	-702.281
						Kick0097	-702.281																50	68.2019	33.0391	-27.9679	-94.8014
						Kick0014	-702.284								g1	1.185	1.193					g1	58.3312	76.1687	41.0628	-20.0789	-92.6341
						Kick0018	-702.285								ts1	1.187	1.188	-23.1882				ts1	57.4554	75.5815	40.6664	-20.1325	-92.8022
						Kick0047	-702.29								g2	1.185	1.193					g2	58.3312	76.1687	41.0627	-19.2294	-91.64
						Kick0086	-702.29								ts2	1.191	1.208	-121.205				ts2	56.4102	73.5884	38.3815	-17.2411	-94.0624
															g3	1.238	1.295					g3	73.6886	79.1385	54.9573	-0.430136	-71.371
															ts3	1.219	1.261	-23.7813				ts4	61.4672	78.9854	37.9291	-23.4172	-94.985
															g4	1.247	1.363					g4	67.6195	84.5837	54.9572	0.664405	-73.7185
															ts4	1.207	2.07	-260.974				ts4	43.1039	43.2858	27.0121	2.91032	-65.7504
															g5	1.201	3.873					g5	70.0609	71.0124	49.9756	2.4773	-51.4231
															ts5	1.201	4.205	-89.3603				ts5	51.2697	49.7123	41.0653	-7.27897
															g6	1.224	4.325					g6	52.8494	52.1313	50.0115	6.60638
															ts6	2.285	3.058	-233.896				ts6	-35.3865	-39.0606	-49.6554	-71.7908
															g7	2.87	2.878					g7	-32.5553	-39.0073	-45.6664	-69.5131

## Sheet: Pt4
B3P86/sdd																			v_imag
a.u. to eV	27.2116
CO2	-188.923														orig name	new name
Zero	-668.09
															a35	g1
Pd4		assoc_CO2		chair_CO2		dissoc_CO2		chair_CO2_TS							ts_a35_a03	ts1
Kick0996	-479.079	Kick0045	-668.095	Kick0053	-668.021	Kick0097	-667.972	Kick0041	-667.972						a03	g2
Kick0086	-479.088	Kick0061	-668.096	Kick0017	-668.094	Kick0087	-668.017	Kick0053	-668.015						ts73	ts2
Kick0035	-479.088	Kick0051	-668.103	Kick0003	-668.098	Kick0086	-668.021	Kick0056	-668.09						a51	g3
Kick0039	-479.136	Kick0078	-668.106	Kick0051	-668.104	Kick0003	-668.031	Kick0074	-668.102					interconverts	ts26	ts3
Kick0050	-479.155	Kick0035	-668.106	Kick0061	-668.106	Kick0090	-668.033	Kick0023	-668.105						a82	g4
Kick0994	-479.166	Kick0029	-668.109	Kick0090	-668.106	Kick0078	-668.034	Kick0073	-668.105						ts_a82_a45	ts4
Kick0031	-479.168	Kick0027	-668.114	Kick0046	-668.109	Kick0023	-668.035	Kick0067	-668.106						a45	g5
Kick0047	-479.168	Kick0082	-668.115	Kick0029	-668.115	Kick0044	-668.053	Kick0026	-668.113						qst_a45_a29	ts5
Kick0058	-479.168	Kick0022	-668.12	Kick0026	-668.12	Kick0066	-668.066	Kick0002	-668.114						a29	g6
Kick0000	-479.168	Kick0050	-668.12	Kick0021	-668.135	Kick0012	-668.076	Kick0042	-668.116						ts56	ts6
Kick0021	-479.168	Kick0044	-668.132	Kick0084	-668.135	Kick0053	-668.097								d45	g7
Kick0026	-479.168	Kick0011	-668.134	Kick0074	-668.135	Kick0002	-668.097								t99	ts7
		Kick0049	-668.135			Kick0013	-668.101								g_st99r	g8
		Kick0003	-668.135			Kick0034	-668.102
						Kick0029	-668.105									1	3	5	7	9
						Kick0062	-668.106								Pt4	-479.168	-479.158	-479.158	-479.112	-479.086
						Kick0082	-668.106								Pt4 + CO2	-668.09	-668.08	-668.08	-668.034	-668.008			0	0.2654	0.272089	1.52271	2.22434
						Kick0005	-668.107								g1	-668.106	-668.124	-668.091	-668.07	-668.011		g1	-0.430035	-0.917986	-0.0318745	0.541889	2.15085
						Kick0015	-668.108								ts1	-668.114	-668.135	-668.109	-668.053	-667.987		ts1	-0.646757	-1.21383	-0.522895	1.02282	2.79723
						Kick0079	-668.109								g2	-668.135	-668.138	-668.123	-668.073	-668.014		g2	-1.20682	-1.31351	-0.898368	0.45438	2.07634
						Kick0038	-668.115								ts2	-668.105	-668.135	-668.083	-668.054	-667.979		ts2	-0.409191	-1.21382	0.190646	0.98181	3.02266
						Kick0041	-668.118								g3	-668.103	-668.111	-668.098	-668.071	-668.014		g3	-0.357706	-0.58013	-0.219374	0.529661	2.07634
						Kick0092	-668.119								ts3	-668.113	-668.12	-668.098	-668.053	-668.01		ts4	-0.619186	-0.819408	-0.211735	1.02338	2.16973
						Kick0039	-668.122								g4	-668.115	-668.143	-668.098	-668.064	-667.981		g4	-0.666165	-1.43428	-0.21768	0.706297	2.97281
						Kick0071	-668.124								ts4	-668.115	-668.135	-668.112	-668.053	-668.01		ts4	-0.663451	-1.2138	-0.599041	1.01004	2.18327
						Kick0067	-668.124								g5	-668.095	-668.139	-668.128	-668.075	-668.014		g5	-0.122643	-1.33499	-1.03325	0.417722	2.07634
						Kick0093	-668.129								ts5	-668.094	-668.126	-668.113	-668.082	-667.994		ts5	-0.0918741	-0.979957	-0.613957	0.23321	2.60874
						Kick0000	-668.133								g6	-668.109	-668.12	-668.119	-668.077	-668.02		g6	-0.524702	-0.810913	-0.783383	0.351958	1.92018
						Kick0051	-668.135								ts6	-668.09	-668.087	-668.087	-668.049	-668.01		ts6	0.00875892	0.0801699	0.0734371	1.11032	2.19336
						Kick0045	-668.135								g7	-668.135	-668.143	-668.145	-668.102	-668.028		g7	-1.21822	-1.44763	-1.48901	-0.326934	1.69715
															ts7	-667.959	-667.971	-667.969	-667.939	-667.898		ts7	3.58129	3.25258	3.3054	4.10239	5.23039
															g8	-667.986	-668.019	-668.017	-668.003	-667.958		g8	2.83664	1.94798	1.98288	2.36845	3.6097
																							50	43.365	43.1978	11.9323	-5.60861
															g1	1.184	1.193					g1	60.7509	72.9497	50.7969	36.4528	-3.77114
															ts1	1.214	1.29					ts1	66.1689	80.3457	63.0724	24.4295	-19.9307
															g2	1.241	1.309					g2	80.1704	82.8378	72.4592	38.6405	-1.90841
															ts2	1.243	1.243					ts2	60.2298	80.3456	45.2339	25.4548	-25.5664
															g3	1.236	1.328					g3	58.9426	64.5032	55.4843	36.7585	-1.90839
															ts3	1.254	1.254					ts4	65.4797	70.4852	55.2934	24.4154	-4.24318
															g4	1.21	1.283					g4	66.6541	85.857	55.442	32.3426	-24.3202
															ts4	1.22	1.296					ts4	66.5863	80.345	64.976	24.7491	-4.58165
															g5	1.258	1.416					g5	53.0661	83.3747	75.8314	39.557	-1.9084
															ts5	1.222	5.022					ts5	52.2969	74.4989	65.3489	44.1698	-15.2186
															g6	1.213	3.18					g6	63.1175	70.2728	69.5846	41.201	1.99539
															ts6	1.187	1.962					ts6	49.781	47.9958	48.1641	22.2421	-4.83395
															g7	1.176	4.847					g7	80.4556	86.1907	87.2251	58.1734	7.57128
															ts7	2.111	3.195					ts7	-39.5322	-31.3144	-32.635	-52.5598	-80.7596
															g8	3.158	4.264					g8	-20.9159	1.30062	0.42788	-9.21115	-40.2424

## Sheet: Ag4
B3P86/sdd																			v_imag
a.u. to eV	27.2116
CO2	-188.923														orig name	new name
Zero	-778.76
																g1
Pd4		assoc_CO2		chair_CO2		dissoc_CO2		chair_CO2_TS								ts1
Kick0999	-589.802	Kick0067	-778.75	Kick0003	-778.711	Kick0004	-778.667	Kick0022	-778.528							g2
Kick0005	-589.829	Kick0050	-778.763	Kick0082	-778.763	Kick0060	-778.67	Kick0076	-778.55							ts2
Kick0017	-589.829	Kick0020	-778.764	Kick0019	-778.763	Kick0076	-778.678	Kick0015	-778.676							g3
Kick0035	-589.83	Kick0089	-778.764	Kick0005	-778.764	Kick0078	-778.684	Kick0080	-778.733							ts3
Kick0026	-589.837	Kick0058	-778.764	Kick0094	-778.77	Kick0050	-778.696	Kick0062	-778.733							g4
		Kick0071	-778.77	Kick0062	-778.77	Kick0000	-778.699	Kick0025	-778.761							ts4
		Kick0003	-778.77	Kick0047	-778.77	Kick0088	-778.711									g5
		Kick0017	-778.77	Kick0063	-778.77	Kick0019	-778.72									ts5
		Kick0085	-778.77			Kick0058	-778.72									g6
		Kick0047	-778.77			Kick0073	-778.722									ts6
						Kick0093	-778.733									g7
						Kick0047	-778.733
						Kick0036	-778.764
						Kick0005	-778.764
						Kick0038	-778.769									1	3	5	7	9
						Kick0051	-778.77								Ag4	-589.837	-589.812	-589.705	-589.479	-589.235
															Ag4 + CO2	-778.76	-778.735	-778.628	-778.402	-778.158			0	0.672461	3.59099	9.74766	16.3806
															g1	-778.77	-778.737	-778.63	-778.407	-778.177		g1	-0.269122	0.61173	3.52235	9.60494	15.8482
															ts1	-778.761	-778.728	-778.625	-778.479	-778.303		ts1	-0.0308401	0.869614	3.66523	7.62907	12.4401
															g2	-778.764	-778.74	-778.636	-778.483	-778.312		g2	-0.11958	0.542621	3.36193	7.51923	12.195
																							50	33.1885	-39.7747	-193.692	-359.514
																						g1	56.728	34.7067	-38.0587	-190.123	-346.205
																		v_imag				ts1	50.771	28.2597	-41.6307	-140.727	-261.004
															g1	1.185	1.191					g2	52.9895	36.4345	-34.0483	-137.981	-254.876
															ts1	1.208	1.229	-128.614
															g2	1.23	1.253

## Sheet: Nb5
B3P86/sdd
a.u. to eV	27.2116
CO2	-188.923												Physisorbed
Zero	-475.117												axial	k0078	-475.129	-0.31631
													eq_centre	k0071	-475.135	-0.48339
Nb5		assoc_CO2		chair_CO2		dissoc_CO2		chair_CO2_TS					eq_side	k0067	-475.135	-0.490737
Kick0067	-286.118	Kick0078	-475.129	Kick0055	-475.129	Kick0080	-475.129	Kick0041	-475.129
Kick0026	-286.195	Kick0054	-475.129	Kick0022	-475.135	Kick0097	-475.136	Kick0019	-475.131
		Kick0071	-475.135	Kick0091	-475.136	Kick0000	-475.147	Kick0008	-475.135					orig name	new name
		Kick0070	-475.135	Kick0082	-475.139	Kick0096	-475.18	Kick0050	-475.135					a0071	g1
		Kick0067	-475.135	Kick0052	-475.142	Kick0072	-475.183	Kick0068	-475.14					qst3_a0071-a0069	ts1
		Kick0023	-475.18	Kick0041	-475.18	Kick0076	-475.189	Kick0069	-475.177					a0069	g2
		Kick0011	-475.187	Kick0047	-475.182	Kick0018	-475.196	Kick0036	-475.183					qst3_a0069-a0038	ts2
		Kick0042	-475.199	Kick0061	-475.199	Kick0051	-475.199	Kick0066	-475.192					k0053_irc_f	g3
		Kick0019	-475.199	Kick0046	-475.203	Kick0016	-475.208	Kick0044	-475.193					ts_k0053	ts3		ts_d0029_mod-3	ts3b
		Kick0089	-475.203	Kick0058	-475.205	Kick0093	-475.228	Kick0064	-475.194					K0053_irc_r	g4		g_d0029_mod-3	g4b
		Kick0000	-475.208	Kick0092	-475.206	Kick0056	-475.23	Kick0062	-475.198					ap_ts_m1	ts4		ts_d0029_mod-5	ts4b
		Kick0069	-475.208	Kick0038	-475.208	Kick0064	-475.232	Kick0053	-475.199					ap_g_tm1r	g5		g_tm5r	g5b
		Kick0030	-475.209	Kick0079	-475.208	Kick0030	-475.233	Kick0027	-475.218								qst2_m5df_d0029	ts5b
		Kick0075	-475.22	Kick0034	-475.208	Kick0025	-475.24	Kick0031	-475.25								d0029	g6b
		Kick0059	-475.22	Kick0011	-475.209	Kick0027	-475.242
		Kick0038	-475.228	Kick0053	-475.215	Kick0053	-475.245
		Kick0061	-475.252	Kick0027	-475.217	Kick0079	-475.248
		Kick0049	-475.264	Kick0050	-475.22	Kick0095	-475.252
		Kick0055	-475.272	Kick0031	-475.221	Kick0014	-475.253							0,2	0,4	0,6	0,8
		Kick0047	-475.28	Kick0045	-475.226	Kick0062	-475.255						Nb5	-286.195	-286.185	-286.155	-286.138
		Kick0072	-475.284	Kick0073	-475.252	Kick0026	-475.256						Nb5 + CO2	-475.117	-475.108	-475.078	-475.061		0	0.257593	1.06992	1.53563		1.06992	1.53563
		Kick0033	-475.284	Kick0081	-475.255	Kick0052	-475.256						g1	-475.135	-475.126	-475.104	-475.079	g1	-0.483394	-0.239039	0.358718	1.0425		0.842113	1.52589
		Kick0035	-475.288	Kick0007	-475.272	Kick0069	-475.26						ts1	-475.138	-475.139	-475.116	-475.096	ts1	-0.573334	-0.594797	0.0288226	0.590693		0.602157	1.16403
		Kick0088	-475.298	Kick0029	-475.275	Kick0023	-475.263						g2	-475.208	-475.197	-475.185	-475.153	g2	-2.46252	-2.18105	-1.84241	-0.96922		0.620112	1.4933
		Kick0041	-475.334	Kick0099	-475.277	Kick0084	-475.263						ts2	-475.198	-475.192	-475.161	-475.143	ts2	-2.19918	-2.03043	-1.17817	-0.711065		1.02101	1.48812
				Kick0026	-475.277	Kick0002	-475.267						g3	-475.228	-475.209	-475.19	-475.167	g3	-3.00264	-2.49506	-1.97385	-1.35308		1.02879	1.64956
				Kick0093	-475.28	Kick0086	-475.268						ts3	-475.199	-475.182	-475.164	-475.159	ts3	-2.21482	-1.76382	-1.27142	-1.13159		0.943399	1.08323
				Kick0067	-475.282	Kick0005	-475.268						g4	-475.215	-475.201	-475.197	-475.169	g4	-2.65426	-2.28585	-2.16625	-1.41866		0.488009	1.2356
				Kick0066	-475.283	Kick0050	-475.27						ts4	-475.267	-475.26	-475.245	-475.213	ts4	-4.06886	-3.89568	-3.47142	-2.61266		0.597438	1.4562
				Kick0090	-475.284	Kick0085	-475.27						g5	-475.366	-475.36	-475.336	-475.303	g5	-6.77766	-6.61181	-5.95447	-5.042		0.823189	1.73566
				Kick0063	-475.284	Kick0057	-475.273						ts3b	-475.194	-475.188	-475.175	-475.154	ts3b	-2.08686	-1.93297	-1.56634	-1.00603		0.520526	1.08083
				Kick0030	-475.298	Kick0074	-475.275						g4b	-475.28	-475.278	-475.26	-475.231	g4b	-4.43553	-4.3746	-3.88125	-3.08676		0.554276	1.34877
				Kick0037	-475.34	Kick0003	-475.276						ts4b	-475.262	-475.252	-475.235	-475.205	ts4b	-3.92767	-3.67087	-3.20409	-2.39299		0.723574	1.53467
				Kick0084	-475.34	Kick0035	-475.277						g5b	-475.34	-475.319	-475.328	-475.295	g5b	-6.05229	-5.48709	-5.73571	-4.84526		0.316578	1.20703
						Kick0089	-475.278						ts5b	-475.338	-475.317	-475.286	-475.26	ts5b	-6.01258	-5.42321	-4.59703	-3.88497		1.41556	2.12761
						Kick0088	-475.28						g6b	-475.363	-475.351	-475.328	-475.295	g6b	-6.68019	-6.37298	-5.73587	-4.84529		0.944328	1.83491
						Kick0087	-475.28
						Kick0082	-475.281
						Kick0071	-475.283												50	43.5602	23.2519	11.6092
						Kick0081	-475.283						g1	1.182	1.193			g1	62.0849	55.976	41.032	23.9375
						Kick0098	-475.284						ts1	1.222	1.327	-56.8589		ts1	64.3334	64.8699	49.2794	35.2327
						Kick0043	-475.284						g2	1.282	1.312			g2	111.563	104.526	96.0603	74.2305
						Kick0039	-475.287						ts2	1.266	1.372	-66.7277		ts2	104.98	100.761	79.4542	67.7766
						Kick0008	-475.289						g3	1.39	1.404			g3	125.066	112.376	99.3463	83.827
						Kick0092	-475.293						ts3	1.7	4.173	-366.073		ts3	105.37	94.0956	81.7855	78.2897
						Kick0073	-475.298						g4	1.284	3.396			g4	116.357	107.146	104.156	85.4665
						Kick0020	-475.298						ts4	1.7	4.173	-330.749		ts4	151.721	147.392	136.785	115.316
						Kick0075	-475.301						g5	2.77	3.657			g5	219.441	215.295	198.862	176.05
						Kick0028	-475.308						ts3b	1.296	1.692	-335.632		ts3b	102.172	98.3243	89.1584	75.1507
						Kick0015	-475.328						g4b	1.34	3.595			g4b	160.888	159.365	147.031	127.169
						Kick0047	-475.349						ts4b	1.89	3.468	-475.585		ts4b	148.192	141.772	130.102	109.825
						Kick0037	-475.352						g5b	3.39	3.925			g5b	201.307	187.177	193.393	171.132
						Kick0010	-475.36						ts5b	3.08	3.576	-140.195		ts5b	200.315	185.58	164.926	147.124
						Kick0040	-475.361						g6b	2.937	3.352			g6b	217.005	209.325	193.397	171.132
						Kick0029	-475.363	0.0361914
						ap_g_t1mr	-475.366	-0.0976352

## Sheet: Mo5
B3P86/sdd
a.u. to eV	27.2116
CO2	-188.923
Zero	-531.396
Mo5		assoc_CO2		chair_CO2		dissoc_CO2		chair_CO2_TS
Kick0062	-342.397	Kick0009	-531.413	Kick0059	-531.413	Kick0020	-531.428	Kick0015	-531.274					orig name	new name
Kick0000	-342.408	Kick0098	-531.413	Kick0030	-531.413	Kick0065	-531.434	Kick0055	-531.282					g1	g1
Kick0028	-342.41	Kick0062	-531.413	Kick0055	-531.418	Kick0071	-531.443	Kick0024	-531.356					ts12	ts1
Kick0050	-342.427	Kick0001	-531.413	Kick0016	-531.441	Kick0096	-531.446	Kick0020	-531.396					g_ts-2f	g2
Kick0049	-342.439	Kick0055	-531.418	Kick0051	-531.451	Kick0052	-531.447	Kick0051	-531.405					ts-2	ts2
Kick0026	-342.473	Kick0041	-531.418	Kick0052	-531.465	Kick0018	-531.447	Kick0000	-531.405					g-2	g3
Kick0089	-342.474	Kick0080	-531.451	Kick0024	-531.465	Kick0009	-531.45	Kick0048	-531.409					qst3_g-2_gfin	ts3
		Kick0044	-531.465	Kick0037	-531.469	Kick0036	-531.45	Kick0001	-531.411					g_ts-4f	g4
	-0.958665	Kick0029	-531.465	Kick0012	-531.471	Kick0063	-531.453	Kick0075	-531.412					qst3_gts4f_g-3	ts4	ts4	ts4b
		Kick0013	-531.465	Kick0036	-531.472	Kick0099	-531.453	Kick0073	-531.418					g_3	g5	gfin	g5b
		Kick0069	-531.469	Kick0095	-531.474	Kick0091	-531.465	Kick0057	-531.421
		Kick0084	-531.472	Kick0067	-531.474	Kick0079	-531.468	Kick0003	-531.433					ts2	ts_ax-eq
		Kick0011	-531.474	Kick0029	-531.474	Kick0081	-531.472	Kick0052	-531.434
		Kick0047	-531.474	Kick0069	-531.484	Kick0072	-531.474	Kick0010	-531.439
		Kick0091	-531.474	Kick0034	-531.485	Kick0090	-531.477	Kick0042	-531.447
		Kick0093	-531.482	Kick0015	-531.489	Kick0061	-531.478	Kick0050	-531.448						0,1	0,3	0,5	0,7
		Kick0014	-531.484	Kick0023	-531.491	Kick0029	-531.481	Kick0034	-531.449					Mo5	-342.474	-342.478	-342.472	-342.423
		Kick0000	-531.485	Kick0080	-531.501	Kick0095	-531.482	Kick0017	-531.454					Mo5 + CO2	-531.396	-531.4	-531.395	-531.346		0	-0.100593	0.0457291	1.38158
		Kick0085	-531.485	Kick0078	-531.508	Kick0087	-531.484	Kick0099	-531.455					g1	-531.413	-531.416	-531.41	-531.364	g1	-0.438067	-0.517894	-0.370432	0.885272
		Kick0024	-531.489	Kick0084	-531.512	Kick0046	-531.485	Kick0083	-531.456					ts1	-531.45	-531.446	-531.429	-531.407	ts1	-1.45509	-1.35385	-0.88299	-0.286413
		Kick0090	-531.491	Kick0096	-531.514	Kick0064	-531.486	Kick0078	-531.463					g2	-531.516	-531.516	-531.505	-531.47	g2	-3.25662	-3.25136	-2.95799	-2.01079
		Kick0063	-531.491	Kick0044	-531.52	Kick0042	-531.489	Kick0084	-531.465					ts2	-531.473	-531.489	-531.477	-531.46	ts2	-2.09166	-2.50762	-2.20225	-1.73996
		Kick0094	-531.493	Kick0083	-531.531	Kick0097	-531.492	Kick0044	-531.47					g3	-531.49	-531.496	-531.489	-531.466	g3	-2.54677	-2.71653	-2.50506	-1.88192
		Kick0073	-531.501	Kick0093	-531.541	Kick0059	-531.493	Kick0046	-531.474					ts4	-531.545	-531.543	-531.536	-531.549	ts4	-4.04137	-3.98079	-3.78625	-4.14353
		Kick0004	-531.509			Kick0089	-531.494							g4	-531.498	-531.502	-531.497	-531.476	g4	-2.76738	-2.87822	-2.72171	-2.15765
		Kick0017	-531.512			Kick0070	-531.5							ts4	-531.545	-531.543	-531.536	-531.549	ts4	-4.04137	-3.98079	-3.78625	-4.14353
		Kick0031	-531.527			Kick0016	-531.501							g5	-531.577	-531.575	-531.562	-531.552	g5	-4.90504	-4.84688	-4.50779	-4.24049
		Kick0079	-531.531			Kick0078	-531.502				-531.567			ts4b	-531.477	-531.49	-531.494	-531.471	ts4b	-2.19399	-2.55327	-2.66186	-2.01845
		Kick0081	-531.541			Kick0047	-531.505							g5b	-531.567	-531.564	-531.554	-531.559	g5b	-4.63534	-4.55239	-4.29877	-4.4119
		Kick0096	-531.564			Kick0007	-531.508
		Kick0006	-531.567			Kick0066	-531.509
						Kick0025	-531.509													50	52.5148	48.8568	15.4605
						Kick0021	-531.512							g1	1.184	1.19			g1	60.9517	62.9474	59.2608	27.8682
						Kick0074	-531.512							ts1	1.191	1.8	-355.913		ts1	86.3772	83.8463	72.0748	57.1603
						Kick0050	-531.512							g2	1.249	3.509			g2	131.416	131.284	123.95	100.27
						Kick0075	-531.515							ts2	1.329	3.655	-239.742		ts2	102.292	112.69	105.056	93.4989
						Kick0093	-531.516							g3	1.359	4.025			g3	113.669	117.913	112.626	97.0481
						Kick0011	-531.516							ts3	3.183	4.215	-165.196		ts4	151.034	149.52	144.656	153.588
						Kick0022	-531.519							g4	1.382	4.04			g4	119.185	121.955	118.043	103.941
						Kick0033	-531.52							ts4	3.183	4.215	-157.677		ts4	151.034	149.52	144.656	153.588
						Kick0056	-531.52							g5	3.714	4.84			g5	172.626	171.172	162.695	156.012
						Kick0038	-531.52							ts4b	1.59	4.027	-120.028		ts4b	104.85	113.832	116.546	100.461
						Kick0031	-531.521							g5b	3.34	3.446			g5b	165.883	163.81	157.469	160.297
						Kick0039	-531.523
						Kick0049	-531.524
						Kick0028	-531.527							ts_ax-eq			-261.035
						Kick0077	-531.527
						Kick0034	-531.529
						Kick0008	-531.531
						Kick0082	-531.541

## Sheet: Ru5
B3P86/sdd
a.u. to eV	27.2116												Physisorbed	top	a0011
CO2	-188.923													base	a0047
Zero	-665.197
Ru5		assoc_CO2		chair_CO2		dissoc_CO2		chair_CO2_TS
Kick0019	-476.103	Kick0010	-665.138	Kick0074	-665.197	Kick0056	-665.192	Kick0020	-664.954					orig name	new name
Kick0062	-476.111	Kick0044	-665.177	Kick0007	-665.21	Kick0094	-665.197	Kick0085	-665.046					a0011	g1	a0047	g1b
Kick0044	-476.118	Kick0038	-665.202	Kick0053	-665.214	Kick0032	-665.208	Kick0010	-665.065					ts87	ts1	ts85	ts1b
Kick0035	-476.156	Kick0011	-665.21	Kick0093	-665.214	Kick0026	-665.209	Kick0059	-665.075					g_s_ts92r	g2		N/A
Kick0011	-476.157	Kick0054	-665.214	Kick0077	-665.214	Kick0075	-665.213	Kick0031	-665.082					ts_s92	ts2		N/A
Kick0097	-476.164	Kick0097	-665.214	Kick0019	-665.219	Kick0038	-665.213	Kick0073	-665.164					g_s_ts92f	g3
Kick0025	-476.189	Kick0047	-665.214	Kick0031	-665.228	Kick0087	-665.213	Kick0011	-665.167					tss90	ts3
Kick0096	-476.191	Kick0049	-665.228	Kick0052	-665.239	Kick0001	-665.226	Kick0050	-665.176					g_s_ts95f	g4
Kick0086	-476.197	Kick0099	-665.242	Kick0071	-665.243	Kick0042	-665.228	Kick0084	-665.188					ts95	ts4
Kick0064	-476.2	Kick0002	-665.243	Kick0080	-665.25	Kick0057	-665.243	Kick0015	-665.189					qst3_g98_d0005 (not TS)	g5
Kick0040	-476.224	Kick0015	-665.244	Kick0037	-665.267	Kick0072	-665.245	Kick0067	-665.195					ts_sv2r	ts5
Kick0073	-476.274	Kick0037	-665.25	Kick0027	-665.27	Kick0071	-665.246	Kick0002	-665.199					d0005	g6
Kick0030	-476.274	Kick0034	-665.255	Kick0082	-665.278	Kick0012	-665.246	Kick0068	-665.209					ts96	ts6
Kick0059	-476.274	Kick0035	-665.267	Kick0050	-665.281	Kick0092	-665.248	Kick0062	-665.212					g99	g7
Kick0041	-476.274	Kick0081	-665.267	Kick0028	-665.285	Kick0004	-665.25	Kick0003	-665.215					qst3_g99_gts96f	ts7
Kick0079	-476.274	Kick0076	-665.274			Kick0064	-665.253	Kick0091	-665.218					g_s_ts96f	g8
Kick0018	-476.274	Kick0021	-665.276			Kick0008	-665.253	Kick0092	-665.22
Kick0016	-476.274					Kick0050	-665.263	Kick0071	-665.222					qst2_g90_a0099	ts99
Kick0099	-476.274					Kick0003	-665.267	Kick0082	-665.239
Kick0033	-476.274					Kick0095	-665.268	Kick0098	-665.242
Kick0048	-476.274					Kick0030	-665.268								0,1	0,3	0,5	0,7	0,9	0,11	0,13	0,15
						Kick0039	-665.268							Ru5	-476.274	-476.27	-476.265	-476.257	-476.279	-476.283	-476.298	-476.258		0,1	0,3	0,5	0,7	0,9	0,11	0,13	0,15
	-1.36929					Kick0070	-665.273							Ru5 + CO2	-665.197	-665.193	-665.188	-665.18	-665.202	-665.205	-665.221	-665.181		0	0.103967	0.253264	0.464701	-0.133533	-0.228613	-0.649544	0.433522
						Kick0066	-665.274							g1	-665.21	-665.212	-665.199	-665.218	-665.22	-665.221	-665.235	-665.236	g1	-0.361392	-0.411427	-0.0500908	-0.564971	-0.642035	-0.655919	-1.02706	-1.07476
						Kick0007	-665.274							ts1	-665.245	-665.255	-665.251	-665.255	-665.262	-665.249	-665.27	-665.246	ts1	-1.32027	-1.57781	-1.47555	-1.57815	-1.77957	-1.42399	-1.98254	-1.33957
						Kick0084	-665.274							g2	-665.228	-665.227	-665.24	-665.261	-665.25	-665.279	-665.27	-665.258	g2	-0.845845	-0.807212	-1.16091	-1.7477	-1.45522	-2.23045	-1.99467	-1.66969
						Kick0006	-665.276							ts2	-665.22	-665.219	-665.238	-665.242	-665.246	-665.258	-665.235	-665.239	ts2	-0.63518	-0.604081	-1.10761	-1.22359	-1.32823	-1.6604	-1.03269	-1.1351
						Kick0020	-665.276							g3	-665.267	-665.275	-665.261	-665.27	-665.276	-665.279	-665.277	-665.269	g3	-1.92142	-2.13581	-1.75778	-2.00135	-2.16066	-2.23061	-2.17993	-1.97243
						Kick0076	-665.277							ts3	-665.272	-665.286	-665.291	-665.297	-665.291	-665.28	-665.266	-665.259	ts3	-2.03299	-2.43497	-2.55867	-2.73283	-2.56073	-2.25679	-1.87261	-1.69396
						Kick0023	-665.278							g4	-665.285	-665.3	-665.301	-665.296	-665.3	-665.291	-665.282	-665.255	g4	-2.41065	-2.7989	-2.83353	-2.6885	-2.80086	-2.55864	-2.30487	-1.59442
						Kick0041	-665.278							ts4	-665.278	-665.29	-665.295	-665.29	-665.287	-665.269	-665.264	-665.268	ts4	-2.19631	-2.52835	-2.65713	-2.5274	-2.46103	-1.95688	-1.8227	-1.92535
						Kick0067	-665.281							g5	-665.294	-665.298	-665.299	-665.295	-665.289	-665.282	-665.264	-665.268	g5	-2.63966	-2.7527	-2.78363	-2.66077	-2.51705	-2.31503	-1.83214	-1.93116
						Kick0097	-665.281							ts5	-665.276	-665.296	-665.294	-665.296	-665.3	-665.298	-665.297	-665.273	ts5	-2.14469	-2.69353	-2.6316	-2.70512	-2.80412	-2.75324	-2.72	-2.07628
						Kick0098	-665.282							g6	-665.294	-665.294	-665.293	-665.295	-665.293	-665.287	-665.28	-665.256	g6	-2.63965	-2.63297	-2.60492	-2.66576	-2.61829	-2.45685	-2.25778	-1.59604
						Kick0024	-665.282							ts6	-665.187	-665.197	-665.23	-665.214	-665.206	-665.202	-665.196	-665.16	ts6	0.26692	0.0046346	-0.88948	-0.475513	-0.257702	-0.128276	0.0122794	1.00513
						Kick0018	-665.282							g7	-665.225	-665.287	-665.284	-665.261	-665.277	-665.269	-665.254	-665.233	g7	-0.757339	-2.45067	-2.38299	-1.73873	-2.19042	-1.96837	-1.55554	-0.993975
						Kick0078	-665.285							ts7	-665.255	-665.27	-665.263	-665.263	-665.273	-665.26	-665.232	-665.213	ts7	-1.56917	-1.99448	-1.80458	-1.8072	-2.07193	-1.73014	-0.956162	-0.448068
						Kick0002	-665.285							g8	-665.277	-665.287	-665.283	-665.279	-665.279	-665.273	-665.248	-665.246	g8	-2.17399	-2.46338	-2.33493	-2.23826	-2.2439	-2.0793	-1.40221	-1.32651
						Kick0021	-665.289							g1b	-665.214	-665.211	-665.204	-665.216	-665.221	-665.227	-665.232	-665.236	g1b	-0.461746	-0.370967	-0.193993	-0.522575	-0.666513	-0.826737	-0.950861	-1.07476
						Kick0088	-665.29							ts1b	-665.22	-665.239	-665.271	-665.239	-665.246	-665.256	-665.261	-665.245	ts1b	-0.638213	-1.15851	-2.02378	-1.15901	-1.33504	-1.61062	-1.75463	-1.29975
						Kick0005	-665.294							ts99	-665.259	-665.29	-665.285	-665.29	-665.286	-665.284	-665.276	-665.258	ts99	-1.68673	-2.52391	-2.40937	-2.54343	-2.43248	-2.37581	-2.14222	-1.6517
																								-2.63966	-2.7989	-2.83353	-2.73283	-2.80412	-2.75324	-2.72	-2.07628
																								0,1	0,3	0,5	0,7	0,9	0,11	0,13	0,15
																								50	47.4008	43.6684	38.3825	53.3383	55.7153	66.2386	39.162
														g1	1.266	1.292							g1	59.0348	60.2857	51.2523	64.1243	66.0509	66.398	75.6765	76.8691
														ts1	1.236	1.309	-35.4775						ts1	83.0067	89.4452	86.8888	89.4538	94.4893	85.5998	99.5635	83.4893
														g2	1.226	1.284							g2	71.1461	70.1803	79.0227	93.6924	86.3804	105.761	99.8668	91.7421
														ts2	1.225	1.292	-76.3738						ts2	65.8795	65.102	77.6903	80.5897	83.2057	91.51	75.8173	78.3774
														g3	1.266	1.291							g3	98.0355	103.395	93.9444	100.034	104.017	105.765	104.498	99.3108
														ts3	1.181	4.357	-163.481						ts3	100.825	110.874	113.967	118.321	114.018	106.42	96.8154	92.3489
														g4	1.189	5.334							g4	110.266	119.972	120.838	117.212	120.021	113.966	107.622	89.8606
														ts4	1.187	5.975	-133.781						ts4	104.908	113.209	116.428	113.185	111.526	98.9221	95.5674	98.1336
														g5	1.217	5.986							g5	115.991	118.818	119.591	116.519	112.926	107.876	95.8034	98.2789
														ts5	1.19	4.223	-131.257						ts5	103.617	117.338	115.79	117.628	120.103	118.831	118	101.907
														g6	1.217	5.985							g6	115.991	115.824	115.123	116.644	115.457	111.421	106.444	89.9011
														ts6	1.848	5.895	-389.525						ts6	43.327	49.8841	72.237	61.8878	56.4426	53.2069	49.693	24.8717
														g7	3.106	5.927							g7	68.9335	111.267	109.575	93.4681	104.761	99.2093	88.8884	74.8494
														ts7	3.534	4.825	-165.104						ts7	89.2294	99.862	95.1145	95.18	101.798	93.2534	73.9041	61.2017
														g8	3.196	4.607							g8	104.35	111.585	108.373	105.957	106.097	101.983	85.0552	83.1626
														g1b	1.188	1.191							g1b	61.5436	59.2742	54.8498	63.0644	66.6628	70.6684	73.7715	76.869
														ts1b	1.255	1.337	-89.225						ts1b	65.9553	78.9628	100.594	78.9752	83.3761	90.2655	93.8658	82.4939
														ts99	1.193	3.05	-333.207						ts99	92.1682	113.098	110.234	113.586	110.812	109.395	103.556	91.2924

[truncated: 6 more sheets: Rh5_k0049, Rh5_k0031, Pd5, Pt5_k0999, Pt5_k0079, Ag5]
